# Supplementary material for: Transcriptional profiling of chickpea genes differentially regulated in response to high-salinity, cold and drought
Source: PubMed Central journal article supplement (PMC2025592; doi:10.1186/1471-2164-8-303), 2007-09-02
Supplement: 1471-2164-8-303-S4.pdf [file 1471-2164-8-303-S4.pdf]

**Additional file 4.** Characteristics of the 768 microarray features.

| Meta Row | Meta Column | Row | Column | GenBank Accession | Gene Name                                             | Source                          | Biosequence Type    | Reporter Usage | Control Type |
|----------|-------------|-----|--------|-------------------|-------------------------------------------------------|---------------------------------|---------------------|----------------|--------------|
| 1        | 1           | 1   | 1      | DY396334          | Aquaporin-like transmembrane channel protein          | <i>Lathyrus sativus</i>         | cDNA clone          | Experimental   | NA           |
| 1        | 1           | 1   | 2      | DY396423          | Gibberellin-regulated protein 3 precursor             | <i>Lathyrus sativus</i>         | cDNA clone          | Experimental   | NA           |
| 1        | 1           | 1   | 3      | NA                | NBS-LRR putative RGA Aj516088                         | <i>Lens culinaris</i> (ILL7537) | Genomic PCR product | Experimental   | NA           |
| 1        | 1           | 1   | 4      | NA                | Lipoxygenase                                          | <i>Lens culinaris</i> (ILL7537) | Genomic PCR product | Experimental   | NA           |
| 1        | 1           | 1   | 5      | NA                | NBS-LRR putative RGA LRI                              | <i>Lens culinaris</i> (ILL7537) | Genomic PCR product | Experimental   | NA           |
| 1        | 1           | 1   | 6      | NA                | NBS-LRR putative RGA Aj516061                         | <i>Lens culinaris</i> (ILL6002) | Genomic PCR product | Experimental   | NA           |
| 1        | 1           | 1   | 7      | NA                | NBS-LRR putative RGA Aj516063                         | <i>Lens culinaris</i> (ILL6002) | Genomic PCR product | Experimental   | NA           |
| 1        | 1           | 1   | 8      | NA                | NBS-LRR putative RGA Aj516065                         | <i>Lens culinaris</i> (ILL6002) | Genomic PCR product | Experimental   | NA           |
| 1        | 1           | 1   | 9      | NA                | NBS-LRR putative RGA Aj516070                         | <i>Lens culinaris</i> (ILL6002) | Genomic PCR product | Experimental   | NA           |
| 1        | 1           | 1   | 10     | NA                | NBS-LRR putative RGA Aj516073                         | <i>Lens culinaris</i> (ILL6002) | Genomic PCR product | Experimental   | NA           |
| 1        | 1           | 2   | 1      | DY396360          | Poly(A)-binding protein                               | <i>Lathyrus sativus</i>         | cDNA clone          | Experimental   | NA           |
| 1        | 1           | 2   | 2      | DY396394          | Transcription initiation factor TFIIID 85 KDA subunit | <i>Lathyrus sativus</i>         | cDNA clone          | Experimental   | NA           |
| 1        | 1           | 2   | 3      | DY396387          | Similarity to RNA-binding protein                     | <i>Lathyrus sativus</i>         | cDNA clone          | Experimental   | NA           |
| 1        | 1           | 2   | 4      | DY396378          | Polyubiquitin                                         | <i>Lathyrus sativus</i>         | cDNA clone          | Experimental   | NA           |
| 1        | 1           | 2   | 5      | DY396376          | Polyubiquitin                                         | <i>Lathyrus sativus</i>         | cDNA clone          | Experimental   | NA           |
| 1        | 1           | 2   | 6      | DY396371          | Polyubiquitin                                         | <i>Lathyrus sativus</i>         | cDNA clone          | Experimental   | NA           |
| 1        | 1           | 2   | 7      | DY396414          | Splicing factor RSZ33                                 | <i>Lathyrus sativus</i>         | cDNA clone          | Experimental   | NA           |
| 1        | 1           | 2   | 8      | DY396410          | Polyubiquitin                                         | <i>Lathyrus sativus</i>         | cDNA clone          | Experimental   | NA           |
| 1        | 1           | 2   | 9      | DY396293          | Thioredoxin                                           | <i>Lathyrus sativus</i>         | cDNA clone          | Experimental   | NA           |
| 1        | 1           | 2   | 10     | DY396290          | Splicing factor-like protein                          | <i>Lathyrus sativus</i>         | cDNA clone          | Experimental   | NA           |
| 1        | 1           | 2   | 11     | DY396282          | 18.2 KDA class I heat shock protein                   | <i>Lathyrus sativus</i>         | cDNA clone          | Experimental   | NA           |
| 1        | 1           | 2   | 12     | DY396279          | NADH dehydrogenase                                    | <i>Lathyrus sativus</i>         | cDNA clone          | Experimental   | NA           |
| 1        | 1           | 2   | 13     | DY396386          | Amine oxidase                                         | <i>Lathyrus sativus</i>         | cDNA clone          | Experimental   | NA           |
| 1        | 1           | 2   | 14     | DY396338          | Senescence-associated protein DIN1                    | <i>Lathyrus sativus</i>         | cDNA clone          | Experimental   | NA           |
| 1        | 1           | 3   | 1      | DY396374          | Subtilisin inhibitors I and II (ASI-I and ASI-II)     | <i>Lathyrus sativus</i>         | cDNA clone          | Experimental   | NA           |
| 1        | 1           | 3   | 2      | DY396379          | Putative auxin-repressed protein                      | <i>Lathyrus sativus</i>         | cDNA clone          | Experimental   | NA           |
| 1        | 1           | 3   | 3      | DY396382          | Protein kinase-like protein                           | <i>Lathyrus sativus</i>         | cDNA clone          | Experimental   | NA           |
| 1        | 1           | 3   | 4      | DY396405          | PR1A precursor                                        | <i>Lathyrus sativus</i>         | cDNA clone          | Experimental   | NA           |
| 1        | 1           | 3   | 5      | DY396389          | Polygalacturonase inhibitor protein                   | <i>Lathyrus sativus</i>         | cDNA clone          | Experimental   | NA           |
| 1        | 1           | 3   | 6      | DY396392          | Multi resistance protein (F20D22.1.1 protein)         | <i>Lathyrus sativus</i>         | cDNA clone          | Experimental   | NA           |
| 1        | 1           | 3   | 7      | DY396288          | Hypothetical proline-rich protein                     | <i>Lathyrus sativus</i>         | cDNA clone          | Experimental   | NA           |
| 1        | 1           | 3   | 8      | DY396302          | Polyubiquitin                                         | <i>Lathyrus sativus</i>         | cDNA clone          | Experimental   | NA           |
| 1        | 1           | 3   | 9      | DY396432          | Transcription initiation factor IIF, beta subunit     | <i>Lathyrus sativus</i>         | cDNA clone          | Experimental   | NA           |

|   |   |   |    |          |                                                   |                         |            |              |    |
|---|---|---|----|----------|---------------------------------------------------|-------------------------|------------|--------------|----|
| 1 | 1 | 3 | 10 | DY396286 | Ubiquitin                                         | <i>Lathyrus sativus</i> | cDNA clone | Experimental | NA |
| 1 | 1 | 3 | 11 | DY396274 | Ubiquitin-specific protease 6                     | <i>Lathyrus sativus</i> | cDNA clone | Experimental | NA |
| 1 | 1 | 3 | 12 | DY396322 | Metallothionein-like protein 1                    | <i>Lathyrus sativus</i> | cDNA clone | Experimental | NA |
| 1 | 1 | 3 | 13 | DY396320 | salt-inducible protein-like                       | <i>Lathyrus sativus</i> | cDNA clone | Experimental | NA |
| 1 | 1 | 3 | 14 | DY396318 | Transcription initiation factor IIF beta subunit  | <i>Lathyrus sativus</i> | cDNA clone | Experimental | NA |
| 1 | 1 | 4 | 1  | NA       | Unknown                                           | <i>Cicer arietinum</i>  | cDNA clone | Experimental | NA |
| 1 | 1 | 4 | 2  | EB085055 | 26S rRNA                                          | <i>Cicer arietinum</i>  | cDNA clone | Experimental | NA |
| 1 | 1 | 4 | 3  | NA       | Unknown                                           | <i>Cicer arietinum</i>  | cDNA clone | Experimental | NA |
| 1 | 1 | 4 | 4  | EB085058 | Unclear                                           | <i>Cicer arietinum</i>  | cDNA clone | Experimental | NA |
| 1 | 1 | 4 | 5  | DY396283 | Protein kinase C inhibitor-like protein           | <i>Lathyrus sativus</i> | cDNA clone | Experimental | NA |
| 1 | 1 | 4 | 6  | DY396289 | Putative auxin-repressed protein                  | <i>Lathyrus sativus</i> | cDNA clone | Experimental | NA |
| 1 | 1 | 4 | 7  | DY396292 | Putative auxin-repressed protein                  | <i>Lathyrus sativus</i> | cDNA clone | Experimental | NA |
| 1 | 1 | 4 | 8  | DY396296 | Disease resistance response protein 39 precursor  | <i>Lathyrus sativus</i> | cDNA clone | Experimental | NA |
| 1 | 1 | 4 | 9  | DY396299 | Beta-glucan binding protein                       | <i>Lathyrus sativus</i> | cDNA clone | Experimental | NA |
| 1 | 1 | 4 | 10 | DY396301 | Pathogenesis-related protein                      | <i>Lathyrus sativus</i> | cDNA clone | Experimental | NA |
| 1 | 1 | 4 | 11 | DY396305 | Pathogenesis-related protein                      | <i>Lathyrus sativus</i> | cDNA clone | Experimental | NA |
| 1 | 1 | 4 | 12 | DY396311 | Disease resistance response protein 230 precursor | <i>Lathyrus sativus</i> | cDNA clone | Experimental | NA |
| 1 | 1 | 4 | 13 | DY396365 | Serine acetyl transferase                         | <i>Lathyrus sativus</i> | cDNA clone | Experimental | NA |
| 1 | 1 | 4 | 14 | DY396369 | Putative WD-repeat protein                        | <i>Lathyrus sativus</i> | cDNA clone | Experimental | NA |
| 1 | 1 | 5 | 1  | EB085019 | Chloroplast DNA                                   | <i>Cicer arietinum</i>  | cDNA clone | Experimental | NA |
| 1 | 1 | 5 | 2  | EB085021 | Unknown                                           | <i>Cicer arietinum</i>  | cDNA clone | Experimental | NA |
| 1 | 1 | 5 | 3  | EB085038 | Chloroplast DNA                                   | <i>Cicer arietinum</i>  | cDNA clone | Experimental | NA |
| 1 | 1 | 5 | 4  | EB085039 | Unknown                                           | <i>Cicer arietinum</i>  | cDNA clone | Experimental | NA |
| 1 | 1 | 5 | 5  | DY475538 | Unknown                                           | <i>Cicer arietinum</i>  | cDNA clone | Experimental | NA |
| 1 | 1 | 5 | 6  | NA       | Unknown                                           | <i>Cicer arietinum</i>  | cDNA clone | Experimental | NA |
| 1 | 1 | 5 | 7  | NA       | Unknown                                           | <i>Cicer arietinum</i>  | cDNA clone | Experimental | NA |
| 1 | 1 | 5 | 8  | EB085043 | Translation initiation factor SUI1                | <i>Cicer arietinum</i>  | cDNA clone | Experimental | NA |
| 1 | 1 | 5 | 9  | NA       | Unknown                                           | <i>Cicer arietinum</i>  | cDNA clone | Experimental | NA |
| 1 | 1 | 5 | 10 | EB085045 | Unclear                                           | <i>Cicer arietinum</i>  | cDNA clone | Experimental | NA |
| 1 | 1 | 5 | 11 | EB085051 | Unknown                                           | <i>Cicer arietinum</i>  | cDNA clone | Experimental | NA |
| 1 | 1 | 5 | 12 | EB085066 | 4.5S, 5S, 16S and 23S rRNA                        | <i>Cicer arietinum</i>  | cDNA clone | Experimental | NA |
| 1 | 1 | 5 | 13 | EB085053 | Unknown                                           | <i>Cicer arietinum</i>  | cDNA clone | Experimental | NA |
| 1 | 1 | 5 | 14 | NA       | Unknown                                           | <i>Cicer arietinum</i>  | cDNA clone | Experimental | NA |
| 1 | 1 | 6 | 1  | NA       | Unknown                                           | <i>Cicer arietinum</i>  | cDNA clone | Experimental | NA |
| 1 | 1 | 6 | 2  | NA       | Unknown                                           | <i>Cicer arietinum</i>  | cDNA clone | Experimental | NA |
| 1 | 1 | 6 | 3  | NA       | Unknown                                           | <i>Cicer arietinum</i>  | cDNA clone | Experimental | NA |

|   |   |   |   |    |          |                                 |                        |            |              |    |
|---|---|---|---|----|----------|---------------------------------|------------------------|------------|--------------|----|
| 1 | 1 | 1 | 6 | 4  | NA       | Unknown                         | <i>Cicer arietinum</i> | cDNA clone | Experimental | NA |
| 1 | 1 | 1 | 6 | 5  | EB085060 | Unknown                         | <i>Cicer arietinum</i> | cDNA clone | Experimental | NA |
| 1 | 1 | 1 | 6 | 6  | NA       | Unknown                         | <i>Cicer arietinum</i> | cDNA clone | Experimental | NA |
| 1 | 1 | 1 | 6 | 7  | EB085027 | 5.8S, 18S and 25S rRNA          | <i>Cicer arietinum</i> | cDNA clone | Experimental | NA |
| 1 | 1 | 1 | 6 | 8  | NA       | Unknown                         | <i>Cicer arietinum</i> | cDNA clone | Experimental | NA |
| 1 | 1 | 1 | 6 | 9  | NA       | Unknown                         | <i>Cicer arietinum</i> | cDNA clone | Experimental | NA |
| 1 | 1 | 1 | 6 | 10 | EB085065 | 18S rRNA                        | <i>Cicer arietinum</i> | cDNA clone | Experimental | NA |
| 1 | 1 | 1 | 6 | 11 | DY475554 | Chlorophyll a/b binding protein | <i>Cicer arietinum</i> | cDNA clone | Experimental | NA |
| 1 | 1 | 1 | 6 | 12 | NA       | Unknown                         | <i>Cicer arietinum</i> | cDNA clone | Experimental | NA |
| 1 | 1 | 1 | 6 | 13 | DY475536 | Unknown                         | <i>Cicer arietinum</i> | cDNA clone | Experimental | NA |
| 1 | 1 | 1 | 6 | 14 | DY475532 | Unknown                         | <i>Cicer arietinum</i> | cDNA clone | Experimental | NA |
| 1 | 1 | 1 | 7 | 1  | DY475350 | Unknown                         | <i>Cicer arietinum</i> | cDNA clone | Experimental | NA |
| 1 | 1 | 1 | 7 | 2  | DY475353 | Unknown                         | <i>Cicer arietinum</i> | cDNA clone | Experimental | NA |
| 1 | 1 | 1 | 7 | 3  | DY475360 | Unknown                         | <i>Cicer arietinum</i> | cDNA clone | Experimental | NA |
| 1 | 1 | 1 | 7 | 4  | DY475363 | Unknown                         | <i>Cicer arietinum</i> | cDNA clone | Experimental | NA |
| 1 | 1 | 1 | 7 | 5  | DY475365 | Unknown                         | <i>Cicer arietinum</i> | cDNA clone | Experimental | NA |
| 1 | 1 | 1 | 7 | 6  | DY475369 | Unknown                         | <i>Cicer arietinum</i> | cDNA clone | Experimental | NA |
| 1 | 1 | 1 | 7 | 7  | DY475436 | Unknown                         | <i>Cicer arietinum</i> | cDNA clone | Experimental | NA |
| 1 | 1 | 1 | 7 | 8  | DY475439 | Unknown                         | <i>Cicer arietinum</i> | cDNA clone | Experimental | NA |
| 1 | 1 | 1 | 7 | 9  | DY475446 | Unknown                         | <i>Cicer arietinum</i> | cDNA clone | Experimental | NA |
| 1 | 1 | 1 | 7 | 10 | DY475459 | Unknown                         | <i>Cicer arietinum</i> | cDNA clone | Experimental | NA |
| 1 | 1 | 1 | 7 | 11 | DY475462 | Unknown                         | <i>Cicer arietinum</i> | cDNA clone | Experimental | NA |
| 1 | 1 | 1 | 7 | 12 | DY475472 | Unknown                         | <i>Cicer arietinum</i> | cDNA clone | Experimental | NA |
| 1 | 1 | 1 | 7 | 13 | DY475481 | Unknown                         | <i>Cicer arietinum</i> | cDNA clone | Experimental | NA |
| 1 | 1 | 1 | 7 | 14 | DY475483 | Unknown                         | <i>Cicer arietinum</i> | cDNA clone | Experimental | NA |
| 1 | 1 | 1 | 8 | 1  | DY475171 | Unknown                         | <i>Cicer arietinum</i> | cDNA clone | Experimental | NA |
| 1 | 1 | 1 | 8 | 2  | DY475178 | Unknown                         | <i>Cicer arietinum</i> | cDNA clone | Experimental | NA |
| 1 | 1 | 1 | 8 | 3  | DY475187 | Unknown                         | <i>Cicer arietinum</i> | cDNA clone | Experimental | NA |
| 1 | 1 | 1 | 8 | 4  | DY475191 | Unknown                         | <i>Cicer arietinum</i> | cDNA clone | Experimental | NA |
| 1 | 1 | 1 | 8 | 5  | DY475260 | Unknown                         | <i>Cicer arietinum</i> | cDNA clone | Experimental | NA |
| 1 | 1 | 1 | 8 | 6  | DY475268 | Unknown                         | <i>Cicer arietinum</i> | cDNA clone | Experimental | NA |
| 1 | 1 | 1 | 8 | 7  | DY475275 | Unknown                         | <i>Cicer arietinum</i> | cDNA clone | Experimental | NA |
| 1 | 1 | 1 | 8 | 8  | DY475279 | Unknown                         | <i>Cicer arietinum</i> | cDNA clone | Experimental | NA |
| 1 | 1 | 1 | 8 | 9  | DY475281 | Unknown                         | <i>Cicer arietinum</i> | cDNA clone | Experimental | NA |
| 1 | 1 | 1 | 8 | 10 | DY475288 | Unknown                         | <i>Cicer arietinum</i> | cDNA clone | Experimental | NA |
| 1 | 1 | 1 | 8 | 11 | DY475291 | Unknown                         | <i>Cicer arietinum</i> | cDNA clone | Experimental | NA |

|   |   |    |    |          |                                                                           |                        |            |              |    |
|---|---|----|----|----------|---------------------------------------------------------------------------|------------------------|------------|--------------|----|
| 1 | 1 | 8  | 12 | DY475295 | Unknown                                                                   | <i>Cicer arietinum</i> | cDNA clone | Experimental | NA |
| 1 | 1 | 8  | 13 | DY475342 | Unknown                                                                   | <i>Cicer arietinum</i> | cDNA clone | Experimental | NA |
| 1 | 1 | 8  | 14 | DY475347 | Unknown                                                                   | <i>Cicer arietinum</i> | cDNA clone | Experimental | NA |
| 1 | 1 | 9  | 1  | DY475323 | Unclear                                                                   | <i>Cicer arietinum</i> | cDNA clone | Experimental | NA |
| 1 | 1 | 9  | 2  | DY475333 | Unclear                                                                   | <i>Cicer arietinum</i> | cDNA clone | Experimental | NA |
| 1 | 1 | 9  | 3  | DY475552 | Unclear                                                                   | <i>Cicer arietinum</i> | cDNA clone | Experimental | NA |
| 1 | 1 | 9  | 4  | DY475522 | Unclear                                                                   | <i>Cicer arietinum</i> | cDNA clone | Experimental | NA |
| 1 | 1 | 9  | 5  | DY475528 | Unclear                                                                   | <i>Cicer arietinum</i> | cDNA clone | Experimental | NA |
| 1 | 1 | 9  | 6  | DY475054 | Unknown                                                                   | <i>Cicer arietinum</i> | cDNA clone | Experimental | NA |
| 1 | 1 | 9  | 7  | DY475056 | Unknown                                                                   | <i>Cicer arietinum</i> | cDNA clone | Experimental | NA |
| 1 | 1 | 9  | 8  | DY475062 | Unknown                                                                   | <i>Cicer arietinum</i> | cDNA clone | Experimental | NA |
| 1 | 1 | 9  | 9  | DY475067 | Unknown                                                                   | <i>Cicer arietinum</i> | cDNA clone | Experimental | NA |
| 1 | 1 | 9  | 10 | DY475079 | Unknown                                                                   | <i>Cicer arietinum</i> | cDNA clone | Experimental | NA |
| 1 | 1 | 9  | 11 | DY475157 | Unknown                                                                   | <i>Cicer arietinum</i> | cDNA clone | Experimental | NA |
| 1 | 1 | 9  | 12 | DY475159 | Unknown                                                                   | <i>Cicer arietinum</i> | cDNA clone | Experimental | NA |
| 1 | 1 | 9  | 13 | DY475165 | Unknown                                                                   | <i>Cicer arietinum</i> | cDNA clone | Experimental | NA |
| 1 | 1 | 9  | 14 | DY475167 | Unknown                                                                   | <i>Cicer arietinum</i> | cDNA clone | Experimental | NA |
| 1 | 1 | 10 | 1  | DY475209 | Lipid transfer protein                                                    | <i>Cicer arietinum</i> | cDNA clone | Experimental | NA |
| 1 | 1 | 10 | 2  | DY475290 | GTP-binding protein                                                       | <i>Cicer arietinum</i> | cDNA clone | Experimental | NA |
| 1 | 1 | 10 | 3  | DY475447 | Protein transport protein                                                 | <i>Cicer arietinum</i> | cDNA clone | Experimental | NA |
| 1 | 1 | 10 | 4  | DY475488 | DNAJ-like protein                                                         | <i>Cicer arietinum</i> | cDNA clone | Experimental | NA |
| 1 | 1 | 10 | 5  | DY475523 | Sorting nexin protein                                                     | <i>Cicer arietinum</i> | cDNA clone | Experimental | NA |
| 1 | 1 | 10 | 6  | DY475065 | Unclear                                                                   | <i>Cicer arietinum</i> | cDNA clone | Experimental | NA |
| 1 | 1 | 10 | 7  | DY475086 | Unclear                                                                   | <i>Cicer arietinum</i> | cDNA clone | Experimental | NA |
| 1 | 1 | 10 | 8  | DY475097 | Unclear                                                                   | <i>Cicer arietinum</i> | cDNA clone | Experimental | NA |
| 1 | 1 | 10 | 9  | DY475259 | Unclear                                                                   | <i>Cicer arietinum</i> | cDNA clone | Experimental | NA |
| 1 | 1 | 10 | 10 | DY475264 | Unclear                                                                   | <i>Cicer arietinum</i> | cDNA clone | Experimental | NA |
| 1 | 1 | 10 | 11 | DY475272 | Unclear                                                                   | <i>Cicer arietinum</i> | cDNA clone | Experimental | NA |
| 1 | 1 | 10 | 12 | DY475274 | Unclear                                                                   | <i>Cicer arietinum</i> | cDNA clone | Experimental | NA |
| 1 | 1 | 10 | 13 | DY475292 | Unclear                                                                   | <i>Cicer arietinum</i> | cDNA clone | Experimental | NA |
| 1 | 1 | 10 | 14 | DY475319 | Unclear                                                                   | <i>Cicer arietinum</i> | cDNA clone | Experimental | NA |
| 1 | 1 | 11 | 1  | DY475489 | Chlorophyll a/b binding protein                                           | <i>Cicer arietinum</i> | cDNA clone | Experimental | NA |
| 1 | 1 | 11 | 2  | DY475518 | Chloroplast DNA between the RUBISCO large subunit and ATPase (beta) genes | <i>Cicer arietinum</i> | cDNA clone | Experimental | NA |
| 1 | 1 | 11 | 3  | DY475063 | Chloroplast 30S ribosomal protein S12                                     | <i>Cicer arietinum</i> | cDNA clone | Experimental | NA |
| 1 | 1 | 11 | 4  | DY475104 | Ribosomal protein L41                                                     | <i>Cicer arietinum</i> | cDNA clone | Experimental | NA |
| 1 | 1 | 11 | 5  | DY475117 | 40S ribosomal protein S15                                                 | <i>Cicer arietinum</i> | cDNA clone | Experimental | NA |

|   |   |    |    |          |                                                           |                        |            |              |    |
|---|---|----|----|----------|-----------------------------------------------------------|------------------------|------------|--------------|----|
| 1 | 1 | 11 | 6  | DY475122 | Amino acid transferase                                    | <i>Cicer arietinum</i> | cDNA clone | Experimental | NA |
| 1 | 1 | 11 | 7  | DY475420 | 26S ribosomal protein                                     | <i>Cicer arietinum</i> | cDNA clone | Experimental | NA |
| 1 | 1 | 11 | 8  | DY475425 | 60S ribosomal protein L23                                 | <i>Cicer arietinum</i> | cDNA clone | Experimental | NA |
| 1 | 1 | 11 | 9  | DY475442 | Translation initiation factor                             | <i>Cicer arietinum</i> | cDNA clone | Experimental | NA |
| 1 | 1 | 11 | 10 | DY475499 | S28 ribosomal protein                                     | <i>Cicer arietinum</i> | cDNA clone | Experimental | NA |
| 1 | 1 | 11 | 11 | DY475506 | Chloroplast 50S ribosomal protein                         | <i>Cicer arietinum</i> | cDNA clone | Experimental | NA |
| 1 | 1 | 11 | 12 | DY475510 | 30S ribosomal protein S13                                 | <i>Cicer arietinum</i> | cDNA clone | Experimental | NA |
| 1 | 1 | 11 | 13 | DY475524 | 40S ribosomal protein S27                                 | <i>Cicer arietinum</i> | cDNA clone | Experimental | NA |
| 1 | 1 | 11 | 14 | DY475101 | Chloroplast 16S rRNA                                      | <i>Cicer arietinum</i> | cDNA clone | Experimental | NA |
| 1 | 1 | 12 | 1  | DY475500 | Zinc-binding dehydrogenase                                | <i>Cicer arietinum</i> | cDNA clone | Experimental | NA |
| 1 | 1 | 12 | 2  | DY475530 | Thiamine biosynthesis protein                             | <i>Cicer arietinum</i> | cDNA clone | Experimental | NA |
| 1 | 1 | 12 | 3  | CV793610 | Class 10 pathogenesis related protein                     | <i>Cicer arietinum</i> | cDNA clone | Experimental | NA |
| 1 | 1 | 12 | 4  | CV793594 | Transcription factor of the AP2/EREBP1 DNA binding domain | <i>Cicer arietinum</i> | cDNA clone | Experimental | NA |
| 1 | 1 | 12 | 5  | DY475047 | Photosystem I reaction centre subunit IX                  | <i>Cicer arietinum</i> | cDNA clone | Experimental | NA |
| 1 | 1 | 12 | 6  | DY475058 | Chloroplast CP12 mRNA                                     | <i>Cicer arietinum</i> | cDNA clone | Experimental | NA |
| 1 | 1 | 12 | 7  | DY475069 | Thioredoxin                                               | <i>Cicer arietinum</i> | cDNA clone | Experimental | NA |
| 1 | 1 | 12 | 8  | DY475083 | Ferredoxin-NADP reductase (EC 1.18.1.2)                   | <i>Cicer arietinum</i> | cDNA clone | Experimental | NA |
| 1 | 1 | 12 | 9  | DY475128 | Photosystem I reaction centre subunit IV                  | <i>Cicer arietinum</i> | cDNA clone | Experimental | NA |
| 1 | 1 | 12 | 10 | DY475132 | Photosystem I reaction centre subunit XI                  | <i>Cicer arietinum</i> | cDNA clone | Experimental | NA |
| 1 | 1 | 12 | 11 | DY475142 | Photosystem II D2 protein                                 | <i>Cicer arietinum</i> | cDNA clone | Experimental | NA |
| 1 | 1 | 12 | 12 | DY475148 | Photosystem II protein                                    | <i>Cicer arietinum</i> | cDNA clone | Experimental | NA |
| 1 | 1 | 12 | 13 | DY475454 | Chlorophyll <i>a/b</i> binding protein                    | <i>Cicer arietinum</i> | cDNA clone | Experimental | NA |
| 1 | 1 | 12 | 14 | DY475480 | Photosystem II core complex protein psbY                  | <i>Cicer arietinum</i> | cDNA clone | Experimental | NA |
| 1 | 1 | 13 | 1  | DY475379 | Thymidylate kinase                                        | <i>Cicer arietinum</i> | cDNA clone | Experimental | NA |
| 1 | 1 | 13 | 2  | DY475550 | WD repeat protein                                         | <i>Cicer arietinum</i> | cDNA clone | Experimental | NA |
| 1 | 1 | 13 | 3  | DY475155 | Superoxide dismutase (EC 1.15.1.1)                        | <i>Cicer arietinum</i> | cDNA clone | Experimental | NA |
| 1 | 1 | 13 | 4  | DY475179 | Acetyl transferase                                        | <i>Cicer arietinum</i> | cDNA clone | Experimental | NA |
| 1 | 1 | 13 | 5  | DY475181 | Apocytochrome F                                           | <i>Cicer arietinum</i> | cDNA clone | Experimental | NA |
| 1 | 1 | 13 | 6  | DY475199 | Squalene epoxidase enzyme (EC 1.14.99.7)                  | <i>Cicer arietinum</i> | cDNA clone | Experimental | NA |
| 1 | 1 | 13 | 7  | DY475212 | Glyceraldehyde 3-phosphate dehydrogenase (EC 1.2.1.12)    | <i>Cicer arietinum</i> | cDNA clone | Experimental | NA |
| 1 | 1 | 13 | 8  | DY475240 | Ribose 5-phosphate isomerase (EC 5.3.1.6)                 | <i>Cicer arietinum</i> | cDNA clone | Experimental | NA |
| 1 | 1 | 13 | 9  | DY475234 | Glycine cleavage system H protein                         | <i>Cicer arietinum</i> | cDNA clone | Experimental | NA |
| 1 | 1 | 13 | 10 | DY475547 | Fructose-1,6-bisphosphate aldolase (EC 4.1.2.13)          | <i>Cicer arietinum</i> | cDNA clone | Experimental | NA |
| 1 | 1 | 13 | 11 | DY475443 | Succinate dehydrogenase subunit 3                         | <i>Cicer arietinum</i> | cDNA clone | Experimental | NA |
| 1 | 1 | 13 | 12 | DY475457 | Lipoamide dehydrogenase (EC 1.8.1.4)                      | <i>Cicer arietinum</i> | cDNA clone | Experimental | NA |

|   |   |    |          |                                               |                                 |                     |              |          |
|---|---|----|----------|-----------------------------------------------|---------------------------------|---------------------|--------------|----------|
| 1 | 1 | 13 | DY475475 | Asparagine synthetase (EC 6.3.5.4)            | <i>Cicer arietinum</i>          | cDNA clone          | Experimental | NA       |
| 1 | 1 | 13 | DY475551 | Homogentisate 1,2 dioxygenase (EC 1.13.11.5)  | <i>Cicer arietinum</i>          | cDNA clone          | Experimental | NA       |
| 1 | 1 | 14 | DY475112 | Nucleotide-sugar epimerase                    | <i>Cicer arietinum</i>          | cDNA clone          | Experimental | NA       |
| 1 | 1 | 14 | DY475244 | Nucleotide-sugar dehydratase                  | <i>Cicer arietinum</i>          | cDNA clone          | Experimental | NA       |
| 1 | 1 | 14 | DY475300 | Actin                                         | <i>Cicer arietinum</i>          | cDNA clone          | Experimental | NA       |
| 1 | 1 | 14 | DY475372 | Adenosylhomocysteinase                        | <i>Cicer arietinum</i>          | cDNA clone          | Experimental | NA       |
| 1 | 1 | 14 | DY475049 | Metallothionein protein (MT-2)                | <i>Cicer arietinum</i>          | cDNA clone          | Experimental | NA       |
| 1 | 1 | 14 | DY475076 | Phosphate-induced protein                     | <i>Cicer arietinum</i>          | cDNA clone          | Experimental | NA       |
| 1 | 1 | 14 | DY475092 | Dehydrin cold-induced protein                 | <i>Cicer arietinum</i>          | cDNA clone          | Experimental | NA       |
| 1 | 1 | 14 | DY475137 | Auxin repressed protein                       | <i>Cicer arietinum</i>          | cDNA clone          | Experimental | NA       |
| 1 | 1 | 14 | DY475509 | PPF1 - post floral protein                    | <i>Cicer arietinum</i>          | cDNA clone          | Experimental | NA       |
| 1 | 1 | 14 | DY475077 | Protein kinase                                | <i>Cicer arietinum</i>          | cDNA clone          | Experimental | NA       |
| 1 | 1 | 14 | DY475103 | Protein kinase                                | <i>Cicer arietinum</i>          | cDNA clone          | Experimental | NA       |
| 1 | 1 | 14 | DY475198 | SNAP25 protein                                | <i>Cicer arietinum</i>          | cDNA clone          | Experimental | NA       |
| 1 | 1 | 14 | DY475248 | Polymorphic antigen membrane protein          | <i>Cicer arietinum</i>          | cDNA clone          | Experimental | NA       |
| 1 | 1 | 14 | DY475320 | Serine/threonine protein kinase               | <i>Cicer arietinum</i>          | cDNA clone          | Experimental | NA       |
| 1 | 2 | 1  | NA       | NBS-LRR putative RGA Aj516078                 | <i>Lens culinaris</i> (ILL7537) | Genomic PCR product | Experimental | NA       |
| 1 | 2 | 1  | NA       | NBS-LRR putative RGA Aj516084                 | <i>Lens culinaris</i> (ILL7537) | Genomic PCR product | Experimental | NA       |
| 1 | 2 | 1  | NA       | NBS-LRR putative RGA Aj516078                 | <i>Lens culinaris</i> (ILL6002) | Genomic PCR product | Experimental | NA       |
| 1 | 2 | 1  | NA       | NBS-LRR putative RGA Aj516083                 | <i>Lens culinaris</i> (ILL6002) | Genomic PCR product | Experimental | NA       |
| 1 | 2 | 1  | NA       | NBS-LRR putative RGA Aj516088                 | <i>Lens culinaris</i> (ILL6002) | Genomic PCR product | Experimental | NA       |
| 1 | 2 | 1  | NA       | Copper amine oxidase                          | <i>Lens culinaris</i> (ILL6002) | Genomic PCR product | Experimental | NA       |
| 1 | 2 | 1  | NA       | Isoflavone synthase                           | <i>Lens culinaris</i> (ILL6002) | Genomic PCR product | Experimental | NA       |
| 1 | 2 | 1  | NA       | Printing Control                              | <i>Lens culinaris</i> (ILL6002) | Genomic PCR product | Experimental | NA       |
| 1 | 2 | 1  | NA       | Blank                                         | NA                              | Oligo               | Control      | Printing |
| 1 | 2 | 1  | NA       | Blank                                         | NA                              | Blank               | Control      | Negative |
| 1 | 2 | 1  | NA       | Blank                                         | NA                              | Blank               | Control      | Negative |
| 1 | 2 | 1  | DY396406 | Metallothionein-like protein 1                | <i>Lathyrus sativus</i>         | cDNA clone          | Experimental | NA       |
| 1 | 2 | 2  | DY396402 | Alpha-amylase                                 | <i>Lathyrus sativus</i>         | cDNA clone          | Experimental | NA       |
| 1 | 2 | 2  | DY396399 | Cornifin alpha (small proline-rich protein 1) | <i>Lathyrus sativus</i>         | cDNA clone          | Experimental | NA       |
| 1 | 2 | 2  | DY396270 | Putative deoxytydylate deaminase              | <i>Lathyrus sativus</i>         | cDNA clone          | Experimental | NA       |
| 1 | 2 | 2  | DY396267 | Enolase                                       | <i>Lathyrus sativus</i>         | cDNA clone          | Experimental | NA       |
| 1 | 2 | 2  | DY396428 | Polyubiquitin                                 | <i>Lathyrus sativus</i>         | cDNA clone          | Experimental | NA       |
| 1 | 2 | 2  | DY396420 | Similarity to heat shock related protein      | <i>Lathyrus sativus</i>         | cDNA clone          | Experimental | NA       |
| 1 | 2 | 2  | DY396317 | Putative glutaredoxin                         | <i>Lathyrus sativus</i>         | cDNA clone          | Experimental | NA       |
| 1 | 2 | 2  | DY396419 | Putative tonoplast intrinsic protein          | <i>Lathyrus sativus</i>         | cDNA clone          | Experimental | NA       |
| 1 | 2 | 2  | NA       | NBS-LRR putative RGA Aj516061                 | <i>Lens culinaris</i> (ILL7537) | Genomic PCR product | Experimental | NA       |

|   |   |   |    |          |                                                            |                                 |                     |              |    |
|---|---|---|----|----------|------------------------------------------------------------|---------------------------------|---------------------|--------------|----|
| 1 | 2 | 2 | 11 | NA       | NBS-LRR putative RGA Aj516064                              | <i>Lens culinaris</i> (ILL7537) | Genomic PCR product | Experimental | NA |
| 1 | 2 | 2 | 12 | NA       | NBS-LRR putative RGA Aj516067                              | <i>Lens culinaris</i> (ILL7537) | Genomic PCR product | Experimental | NA |
| 1 | 2 | 2 | 13 | NA       | NBS-LRR putative RGA Aj516071                              | <i>Lens culinaris</i> (ILL7537) | Genomic PCR product | Experimental | NA |
| 1 | 2 | 2 | 14 | NA       | NBS-LRR putative RGA Aj516073                              | <i>Lens culinaris</i> (ILL7537) | Genomic PCR product | Experimental | NA |
| 1 | 2 | 3 | 1  | DY396411 | Calmodulin-binding protein/ER66                            | <i>Lathyrus sativus</i>         | cDNA clone          | Experimental | NA |
| 1 | 2 | 3 | 2  | DY396416 | Disease resistance response protein 230 precursor          | <i>Lathyrus sativus</i>         | cDNA clone          | Experimental | NA |
| 1 | 2 | 3 | 3  | DY396422 | Protein kinase-like protein                                | <i>Lathyrus sativus</i>         | cDNA clone          | Experimental | NA |
| 1 | 2 | 3 | 4  | DY396426 | Subtilisin inhibitors I and II (ASI-I and ASI-II)          | <i>Lathyrus sativus</i>         | cDNA clone          | Experimental | NA |
| 1 | 2 | 3 | 5  | DY396427 | Lectin-like protein                                        | <i>Lathyrus sativus</i>         | cDNA clone          | Experimental | NA |
| 1 | 2 | 3 | 6  | DY396430 | Chalcone reductase                                         | <i>Lathyrus sativus</i>         | cDNA clone          | Experimental | NA |
| 1 | 2 | 3 | 7  | DY396310 | Polyubiquitin                                              | <i>Lathyrus sativus</i>         | cDNA clone          | Experimental | NA |
| 1 | 2 | 3 | 8  | DY396306 | Epoxide hydrolase                                          | <i>Lathyrus sativus</i>         | cDNA clone          | Experimental | NA |
| 1 | 2 | 3 | 9  | DY396342 | Glycine-rich cell wall protein GRP 1.8                     | <i>Lathyrus sativus</i>         | cDNA clone          | Experimental | NA |
| 1 | 2 | 3 | 10 | DY396340 | Cytochrome B5                                              | <i>Lathyrus sativus</i>         | cDNA clone          | Experimental | NA |
| 1 | 2 | 3 | 11 | DY396337 | Alpha-amylase precursor                                    | <i>Lathyrus sativus</i>         | cDNA clone          | Experimental | NA |
| 1 | 2 | 3 | 12 | DY396326 | Ubiquitin                                                  | <i>Lathyrus sativus</i>         | cDNA clone          | Experimental | NA |
| 1 | 2 | 3 | 13 | DY396368 | Ubiquitin                                                  | <i>Lathyrus sativus</i>         | cDNA clone          | Experimental | NA |
| 1 | 2 | 3 | 14 | DY396363 | Magnesium chelatase subunit                                | <i>Lathyrus sativus</i>         | cDNA clone          | Experimental | NA |
| 1 | 2 | 4 | 1  | DY396262 | Probable Ca-binding mitochondrial carrier AT2G35800        | <i>Lathyrus sativus</i>         | cDNA clone          | Experimental | NA |
| 1 | 2 | 4 | 2  | DY396265 | Disease resistance response protein DRRG49-C               | <i>Lathyrus sativus</i>         | cDNA clone          | Experimental | NA |
| 1 | 2 | 4 | 3  | DY396275 | Putative chitinase                                         | <i>Lathyrus sativus</i>         | cDNA clone          | Experimental | NA |
| 1 | 2 | 4 | 4  | DY396277 | Disease resistance response protein 39 precursor           | <i>Lathyrus sativus</i>         | cDNA clone          | Experimental | NA |
| 1 | 2 | 4 | 5  | DY396314 | Immunophilin                                               | <i>Lathyrus sativus</i>         | cDNA clone          | Experimental | NA |
| 1 | 2 | 4 | 6  | DY396331 | Glutathione peroxidase                                     | <i>Lathyrus sativus</i>         | cDNA clone          | Experimental | NA |
| 1 | 2 | 4 | 7  | DY396335 | Nitrate transporter NRT1-1                                 | <i>Lathyrus sativus</i>         | cDNA clone          | Experimental | NA |
| 1 | 2 | 4 | 8  | DY396436 | Putative nuclear transport factor 2                        | <i>Lathyrus sativus</i>         | cDNA clone          | Experimental | NA |
| 1 | 2 | 4 | 9  | DY396345 | Protein kinase-like protein (Serine/Threonine kinase PBS1) | <i>Lathyrus sativus</i>         | cDNA clone          | Experimental | NA |
| 1 | 2 | 4 | 10 | DY396351 | Putative protein kinase                                    | <i>Lathyrus sativus</i>         | cDNA clone          | Experimental | NA |
| 1 | 2 | 4 | 11 | DY396358 | Laccase-like protein                                       | <i>Lathyrus sativus</i>         | cDNA clone          | Experimental | NA |
| 1 | 2 | 4 | 12 | DY396362 | Protein kinase-like protein                                | <i>Lathyrus sativus</i>         | cDNA clone          | Experimental | NA |
| 1 | 2 | 4 | 13 | DY396395 | EREBP-4                                                    | <i>Lathyrus sativus</i>         | cDNA clone          | Experimental | NA |
| 1 | 2 | 4 | 14 | DY396384 | Pathogenesis-related protein 4A                            | <i>Lathyrus sativus</i>         | cDNA clone          | Experimental | NA |
| 1 | 2 | 5 | 1  | NA       | Unknown                                                    | <i>Cicer arietinum</i>          | cDNA clone          | Experimental | NA |
| 1 | 2 | 5 | 2  | EB085037 | Unknown                                                    | <i>Cicer arietinum</i>          | cDNA clone          | Experimental | NA |
| 1 | 2 | 5 | 3  | EB085046 | Unclear                                                    | <i>Cicer arietinum</i>          | cDNA clone          | Experimental | NA |

|   |   |   |   |    |          |                                                              |                         |                  |              |               |
|---|---|---|---|----|----------|--------------------------------------------------------------|-------------------------|------------------|--------------|---------------|
| 1 | 1 | 2 | 5 | 4  | NA       | Unknown                                                      | <i>Cicer arietinum</i>  | cDNA clone       | Experimental | NA            |
| 1 | 1 | 2 | 5 | 5  | NA       | Unknown                                                      | <i>Cicer arietinum</i>  | cDNA clone       | Experimental | NA            |
| 1 | 1 | 2 | 5 | 6  | NA       | Unknown                                                      | <i>Cicer arietinum</i>  | cDNA clone       | Experimental | NA            |
| 1 | 1 | 2 | 5 | 7  | DY475539 | Unknown                                                      | <i>Cicer arietinum</i>  | cDNA clone       | Experimental | NA            |
| 1 | 1 | 2 | 5 | 8  | NA       | Unknown                                                      | <i>Cicer arietinum</i>  | cDNA clone       | Experimental | NA            |
| 1 | 1 | 2 | 5 | 9  | EB085050 | Chloroplast DNA                                              | <i>Cicer arietinum</i>  | cDNA clone       | Experimental | NA            |
| 1 | 1 | 2 | 5 | 10 | NA       | Unknown                                                      | <i>Cicer arietinum</i>  | cDNA clone       | Experimental | NA            |
| 1 | 1 | 2 | 5 | 11 | NA       | Normalisation control 2                                      | <i>Cicer arietinum</i>  | cDNA clone       | Control      | Normalisation |
| 1 | 1 | 2 | 5 | 12 | NA       | Digested pGEM-T Easy Vector II (Promega) Plasmid <i>AluI</i> | NA                      | Digested Plasmid | Control      | Negative      |
| 1 | 1 | 2 | 5 | 13 | NA       | SMART (Clontech) PCR primer                                  | NA                      | Oligo            | Control      | Negative      |
| 1 | 1 | 2 | 5 | 14 | DY396260 | Subtilisin Inhibitors I and II (ASI-I and ASI-II)            | <i>Lathyrus sativus</i> | cDNA clone       | Experimental | NA            |
| 1 | 1 | 2 | 6 | 1  | EB085028 | Unknown                                                      | <i>Cicer arietinum</i>  | cDNA clone       | Experimental | NA            |
| 1 | 1 | 2 | 6 | 2  | EB085029 | Unknown                                                      | <i>Cicer arietinum</i>  | cDNA clone       | Experimental | NA            |
| 1 | 1 | 2 | 6 | 3  | EB085030 | Unknown                                                      | <i>Cicer arietinum</i>  | cDNA clone       | Experimental | NA            |
| 1 | 1 | 2 | 6 | 4  | NA       | Unknown                                                      | <i>Cicer arietinum</i>  | cDNA clone       | Experimental | NA            |
| 1 | 1 | 2 | 6 | 5  | NA       | Unknown                                                      | <i>Cicer arietinum</i>  | cDNA clone       | Experimental | NA            |
| 1 | 1 | 2 | 6 | 6  | NA       | Unknown                                                      | <i>Cicer arietinum</i>  | cDNA clone       | Experimental | NA            |
| 1 | 1 | 2 | 6 | 7  | NA       | Unknown                                                      | <i>Cicer arietinum</i>  | cDNA clone       | Experimental | NA            |
| 1 | 1 | 2 | 6 | 8  | EB085032 | Disease resistance response protein DRRG49-C                 | <i>Cicer arietinum</i>  | cDNA clone       | Experimental | NA            |
| 1 | 1 | 2 | 6 | 9  | EB085023 | 60S rRNA                                                     | <i>Cicer arietinum</i>  | cDNA clone       | Experimental | NA            |
| 1 | 1 | 2 | 6 | 10 | DY475533 | Unknown                                                      | <i>Cicer arietinum</i>  | cDNA clone       | Experimental | NA            |
| 1 | 1 | 2 | 6 | 11 | EB085061 | Unknown                                                      | <i>Cicer arietinum</i>  | cDNA clone       | Experimental | NA            |
| 1 | 1 | 2 | 6 | 12 | NA       | Unknown                                                      | <i>Cicer arietinum</i>  | cDNA clone       | Experimental | NA            |
| 1 | 1 | 2 | 6 | 13 | EB085026 | Unknown                                                      | <i>Cicer arietinum</i>  | cDNA clone       | Experimental | NA            |
| 1 | 1 | 2 | 6 | 14 | NA       | Unknown                                                      | <i>Cicer arietinum</i>  | cDNA clone       | Experimental | NA            |
| 1 | 1 | 2 | 7 | 1  | DY475391 | Unknown                                                      | <i>Cicer arietinum</i>  | cDNA clone       | Experimental | NA            |
| 1 | 1 | 2 | 7 | 2  | DY475399 | Unknown                                                      | <i>Cicer arietinum</i>  | cDNA clone       | Experimental | NA            |
| 1 | 1 | 2 | 7 | 3  | DY475407 | Unknown                                                      | <i>Cicer arietinum</i>  | cDNA clone       | Experimental | NA            |
| 1 | 1 | 2 | 7 | 4  | DY475414 | Unknown                                                      | <i>Cicer arietinum</i>  | cDNA clone       | Experimental | NA            |
| 1 | 1 | 2 | 7 | 5  | DY475426 | Unknown                                                      | <i>Cicer arietinum</i>  | cDNA clone       | Experimental | NA            |
| 1 | 1 | 2 | 7 | 6  | DY475431 | Unknown                                                      | <i>Cicer arietinum</i>  | cDNA clone       | Experimental | NA            |
| 1 | 1 | 2 | 7 | 7  | DY475485 | Unknown                                                      | <i>Cicer arietinum</i>  | cDNA clone       | Experimental | NA            |
| 1 | 1 | 2 | 7 | 8  | DY475491 | Unknown                                                      | <i>Cicer arietinum</i>  | cDNA clone       | Experimental | NA            |
| 1 | 1 | 2 | 7 | 9  | DY475553 | Unknown                                                      | <i>Cicer arietinum</i>  | cDNA clone       | Experimental | NA            |
| 1 | 1 | 2 | 7 | 10 | DY475519 | Unknown                                                      | <i>Cicer arietinum</i>  | cDNA clone       | Experimental | NA            |
| 1 | 1 | 2 | 7 | 11 | DY475521 | Unknown                                                      | <i>Cicer arietinum</i>  | cDNA clone       | Experimental | NA            |



|   |   |    |    |          |         |                        |            |              |    |
|---|---|----|----|----------|---------|------------------------|------------|--------------|----|
| 1 | 2 | 7  | 12 | NA       | Unknown | <i>Cicer arietinum</i> | cDNA clone | Experimental | NA |
| 1 | 2 | 7  | 13 | EB085014 | Unknown | <i>Cicer arietinum</i> | cDNA clone | Experimental | NA |
| 1 | 2 | 7  | 14 | NA       | Unknown | <i>Cicer arietinum</i> | cDNA clone | Experimental | NA |
| 1 | 2 | 8  | 1  | DY475230 | Unknown | <i>Cicer arietinum</i> | cDNA clone | Experimental | NA |
| 1 | 2 | 8  | 2  | DY475236 | Unknown | <i>Cicer arietinum</i> | cDNA clone | Experimental | NA |
| 1 | 2 | 8  | 3  | DY475243 | Unknown | <i>Cicer arietinum</i> | cDNA clone | Experimental | NA |
| 1 | 2 | 8  | 4  | DY475255 | Unknown | <i>Cicer arietinum</i> | cDNA clone | Experimental | NA |
| 1 | 2 | 8  | 5  | DY475298 | Unknown | <i>Cicer arietinum</i> | cDNA clone | Experimental | NA |
| 1 | 2 | 8  | 6  | DY475303 | Unknown | <i>Cicer arietinum</i> | cDNA clone | Experimental | NA |
| 1 | 2 | 8  | 7  | DY475311 | Unknown | <i>Cicer arietinum</i> | cDNA clone | Experimental | NA |
| 1 | 2 | 8  | 8  | DY475315 | Unknown | <i>Cicer arietinum</i> | cDNA clone | Experimental | NA |
| 1 | 2 | 8  | 9  | DY475327 | Unknown | <i>Cicer arietinum</i> | cDNA clone | Experimental | NA |
| 1 | 2 | 8  | 10 | DY475331 | Unknown | <i>Cicer arietinum</i> | cDNA clone | Experimental | NA |
| 1 | 2 | 8  | 11 | DY475337 | Unknown | <i>Cicer arietinum</i> | cDNA clone | Experimental | NA |
| 1 | 2 | 8  | 12 | DY475339 | Unknown | <i>Cicer arietinum</i> | cDNA clone | Experimental | NA |
| 1 | 2 | 8  | 13 | DY475373 | Unknown | <i>Cicer arietinum</i> | cDNA clone | Experimental | NA |
| 1 | 2 | 8  | 14 | DY475382 | Unknown | <i>Cicer arietinum</i> | cDNA clone | Experimental | NA |
| 1 | 2 | 9  | 1  | DY475444 | Unclear | <i>Cicer arietinum</i> | cDNA clone | Experimental | NA |
| 1 | 2 | 9  | 2  | DY475473 | Unclear | <i>Cicer arietinum</i> | cDNA clone | Experimental | NA |
| 1 | 2 | 9  | 3  | DY475081 | Unknown | <i>Cicer arietinum</i> | cDNA clone | Experimental | NA |
| 1 | 2 | 9  | 4  | DY475085 | Unknown | <i>Cicer arietinum</i> | cDNA clone | Experimental | NA |
| 1 | 2 | 9  | 5  | DY475094 | Unknown | <i>Cicer arietinum</i> | cDNA clone | Experimental | NA |
| 1 | 2 | 9  | 6  | DY475100 | Unknown | <i>Cicer arietinum</i> | cDNA clone | Experimental | NA |
| 1 | 2 | 9  | 7  | DY475106 | Unknown | <i>Cicer arietinum</i> | cDNA clone | Experimental | NA |
| 1 | 2 | 9  | 8  | DY475125 | Unknown | <i>Cicer arietinum</i> | cDNA clone | Experimental | NA |
| 1 | 2 | 9  | 9  | DY475133 | Unknown | <i>Cicer arietinum</i> | cDNA clone | Experimental | NA |
| 1 | 2 | 9  | 10 | DY475051 | Unknown | <i>Cicer arietinum</i> | cDNA clone | Experimental | NA |
| 1 | 2 | 9  | 11 | DY475203 | Unknown | <i>Cicer arietinum</i> | cDNA clone | Experimental | NA |
| 1 | 2 | 9  | 12 | DY475208 | Unknown | <i>Cicer arietinum</i> | cDNA clone | Experimental | NA |
| 1 | 2 | 9  | 13 | DY475215 | Unknown | <i>Cicer arietinum</i> | cDNA clone | Experimental | NA |
| 1 | 2 | 9  | 14 | DY475219 | Unknown | <i>Cicer arietinum</i> | cDNA clone | Experimental | NA |
| 1 | 2 | 10 | 1  | DY475114 | Unclear | <i>Cicer arietinum</i> | cDNA clone | Experimental | NA |
| 1 | 2 | 10 | 2  | DY475126 | Unclear | <i>Cicer arietinum</i> | cDNA clone | Experimental | NA |
| 1 | 2 | 10 | 3  | DY475175 | Unclear | <i>Cicer arietinum</i> | cDNA clone | Experimental | NA |
| 1 | 2 | 10 | 4  | DY475205 | Unclear | <i>Cicer arietinum</i> | cDNA clone | Experimental | NA |
| 1 | 2 | 10 | 5  | DY475217 | Unclear | <i>Cicer arietinum</i> | cDNA clone | Experimental | NA |

|   |   |    |    |          |                                                          |                        |            |              |    |
|---|---|----|----|----------|----------------------------------------------------------|------------------------|------------|--------------|----|
| 1 | 2 | 10 | 6  | DY475222 | Unclear                                                  | <i>Cicer arietinum</i> | cDNA clone | Experimental | NA |
| 1 | 2 | 10 | 7  | DY475226 | Unclear                                                  | <i>Cicer arietinum</i> | cDNA clone | Experimental | NA |
| 1 | 2 | 10 | 8  | DY475235 | Unclear                                                  | <i>Cicer arietinum</i> | cDNA clone | Experimental | NA |
| 1 | 2 | 10 | 9  | DY475367 | Unclear                                                  | <i>Cicer arietinum</i> | cDNA clone | Experimental | NA |
| 1 | 2 | 10 | 10 | DY475380 | Unclear                                                  | <i>Cicer arietinum</i> | cDNA clone | Experimental | NA |
| 1 | 2 | 10 | 11 | DY475388 | Unclear                                                  | <i>Cicer arietinum</i> | cDNA clone | Experimental | NA |
| 1 | 2 | 10 | 12 | DY475549 | Unclear                                                  | <i>Cicer arietinum</i> | cDNA clone | Experimental | NA |
| 1 | 2 | 10 | 13 | DY475409 | Unclear                                                  | <i>Cicer arietinum</i> | cDNA clone | Experimental | NA |
| 1 | 2 | 10 | 14 | DY475418 | Unclear                                                  | <i>Cicer arietinum</i> | cDNA clone | Experimental | NA |
| 1 | 2 | 11 | 1  | DY475312 | 60S ribosomal protein L14                                | <i>Cicer arietinum</i> | cDNA clone | Experimental | NA |
| 1 | 2 | 11 | 2  | DY475324 | 60S ribosomal protein L19                                | <i>Cicer arietinum</i> | cDNA clone | Experimental | NA |
| 1 | 2 | 11 | 3  | DY475344 | Chloroplast 50S ribosomal protein L14                    | <i>Cicer arietinum</i> | cDNA clone | Experimental | NA |
| 1 | 2 | 11 | 4  | DY475354 | 40S ribosomal protein S27A                               | <i>Cicer arietinum</i> | cDNA clone | Experimental | NA |
| 1 | 2 | 11 | 5  | DY475371 | 60S ribosomal protein L38                                | <i>Cicer arietinum</i> | cDNA clone | Experimental | NA |
| 1 | 2 | 11 | 6  | DY475395 | 60S ribosomal protein L11                                | <i>Cicer arietinum</i> | cDNA clone | Experimental | NA |
| 1 | 2 | 11 | 7  | DY475109 | Mitochondrial 26S rRNA                                   | <i>Cicer arietinum</i> | cDNA clone | Experimental | NA |
| 1 | 2 | 11 | 8  | DY475146 | Chloroplast 16S rRNA                                     | <i>Cicer arietinum</i> | cDNA clone | Experimental | NA |
| 1 | 2 | 11 | 9  | DY475153 | 26S ribosomal RNA                                        | <i>Cicer arietinum</i> | cDNA clone | Experimental | NA |
| 1 | 2 | 11 | 10 | DY475196 | RNA polymerase beta subunit                              | <i>Cicer arietinum</i> | cDNA clone | Experimental | NA |
| 1 | 2 | 11 | 11 | DY475297 | RNA binding protein                                      | <i>Cicer arietinum</i> | cDNA clone | Experimental | NA |
| 1 | 2 | 11 | 12 | DY475419 | DNA directed RNA polymerase                              | <i>Cicer arietinum</i> | cDNA clone | Experimental | NA |
| 1 | 2 | 11 | 13 | DY475074 | Protein transport protein                                | <i>Cicer arietinum</i> | cDNA clone | Experimental | NA |
| 1 | 2 | 11 | 14 | DY475169 | Potassium channel regulatory factor                      | <i>Cicer arietinum</i> | cDNA clone | Experimental | NA |
| 1 | 2 | 12 | 1  | CV793606 | SNAKIN2 antimicrobial peptide precursor                  | <i>Cicer arietinum</i> | cDNA clone | Experimental | NA |
| 1 | 2 | 12 | 2  | CV793608 | SNAKIN2 antimicrobial peptide precursor                  | <i>Cicer arietinum</i> | cDNA clone | Experimental | NA |
| 1 | 2 | 12 | 3  | CV793603 | Nematode resistance protein <i>HsIpro-1</i> homolog      | <i>Cicer arietinum</i> | cDNA clone | Experimental | NA |
| 1 | 2 | 12 | 4  | CV793587 | Extensin-like protein                                    | <i>Cicer arietinum</i> | cDNA clone | Experimental | NA |
| 1 | 2 | 12 | 5  | DY475163 | Chlorophyll <i>a/b</i> binding protein                   | <i>Cicer arietinum</i> | cDNA clone | Experimental | NA |
| 1 | 2 | 12 | 6  | DY475202 | Chlorophyll <i>a/b</i> binding protein                   | <i>Cicer arietinum</i> | cDNA clone | Experimental | NA |
| 1 | 2 | 12 | 7  | DY475245 | ATP synthase (EC 3.6.1.34)                               | <i>Cicer arietinum</i> | cDNA clone | Experimental | NA |
| 1 | 2 | 12 | 8  | DY475287 | NADH-plastoquinone oxidoreductase subunit I (EC 1.6.5.3) | <i>Cicer arietinum</i> | cDNA clone | Experimental | NA |
| 1 | 2 | 12 | 9  | DY475304 | Similar to ferredoxin-thioredoxin reductase              | <i>Cicer arietinum</i> | cDNA clone | Experimental | NA |
| 1 | 2 | 12 | 10 | DY475316 | NADH dehydrogenase                                       | <i>Cicer arietinum</i> | cDNA clone | Experimental | NA |
| 1 | 2 | 12 | 11 | DY475402 | Chloroplast DNA                                          | <i>Cicer arietinum</i> | cDNA clone | Experimental | NA |
| 1 | 2 | 12 | 12 | DY475430 | Chlorophyll <i>a/b</i> binding protein                   | <i>Cicer arietinum</i> | cDNA clone | Experimental | NA |
| 1 | 2 | 12 | 13 | DY475131 | 50S ribosomal protein L12                                | <i>Cicer arietinum</i> | cDNA clone | Experimental | NA |

|   |   |    |    |          |                                                                        |                                 |                     |              |    |
|---|---|----|----|----------|------------------------------------------------------------------------|---------------------------------|---------------------|--------------|----|
| 1 | 2 | 12 | 14 | DY475238 | Chloroplast 30S ribosomal protein S7                                   | <i>Cicer arietinum</i>          | cDNA clone          | Experimental | NA |
| 1 | 2 | 13 | 1  | DY475136 | Cytochrome P450                                                        | <i>Cicer arietinum</i>          | cDNA clone          | Experimental | NA |
| 1 | 2 | 13 | 2  | DY475149 | UDP-glucose 4-epimerase (EC 5.1.3.2)                                   | <i>Cicer arietinum</i>          | cDNA clone          | Experimental | NA |
| 1 | 2 | 13 | 3  | DY475286 | Similar to alpha galactosidase                                         | <i>Cicer arietinum</i>          | cDNA clone          | Experimental | NA |
| 1 | 2 | 13 | 4  | DY475306 | Cationic peroxidase (EC 1.11.1.7)                                      | <i>Cicer arietinum</i>          | cDNA clone          | Experimental | NA |
| 1 | 2 | 13 | 5  | DY475309 | Xylose isomerase (EC 5.3.1.5)                                          | <i>Cicer arietinum</i>          | cDNA clone          | Experimental | NA |
| 1 | 2 | 13 | 6  | DY475374 | Cytochrome P450                                                        | <i>Cicer arietinum</i>          | cDNA clone          | Experimental | NA |
| 1 | 2 | 13 | 7  | DY475387 | Peptidase-like protein                                                 | <i>Cicer arietinum</i>          | cDNA clone          | Experimental | NA |
| 1 | 2 | 13 | 8  | DY475396 | Similar to endopeptidase                                               | <i>Cicer arietinum</i>          | cDNA clone          | Experimental | NA |
| 1 | 2 | 13 | 9  | DY475403 | Carbonic anhydrase like protein (EC 4.2.1.1)                           | <i>Cicer arietinum</i>          | cDNA clone          | Experimental | NA |
| 1 | 2 | 13 | 10 | DY475415 | Beta glucosidase (EC 3.2.1.21)                                         | <i>Cicer arietinum</i>          | cDNA clone          | Experimental | NA |
| 1 | 2 | 13 | 11 | CV793593 | Homology to putative disease resistance protein from <i>A.thaliana</i> | <i>Cicer arietinum</i>          | cDNA clone          | Experimental | NA |
| 1 | 2 | 13 | 12 | CV793598 | beta-1,3-glucanase                                                     | <i>Cicer arietinum</i>          | cDNA clone          | Experimental | NA |
| 1 | 2 | 13 | 13 | CV793600 | Transcriptional activator                                              | <i>Cicer arietinum</i>          | cDNA clone          | Experimental | NA |
| 1 | 2 | 13 | 14 | CV793602 | Cinnamyl-alcohol-dehydrogenase                                         | <i>Cicer arietinum</i>          | cDNA clone          | Experimental | NA |
| 1 | 2 | 14 | 1  | DY475172 | Phosphate-induced protein                                              | <i>Cicer arietinum</i>          | cDNA clone          | Experimental | NA |
| 1 | 2 | 14 | 2  | DY475192 | Dehydration-induced protein                                            | <i>Cicer arietinum</i>          | cDNA clone          | Experimental | NA |
| 1 | 2 | 14 | 3  | DY475220 | Wound-induced protein                                                  | <i>Cicer arietinum</i>          | cDNA clone          | Experimental | NA |
| 1 | 2 | 14 | 4  | DY475237 | Translation initiation factor                                          | <i>Cicer arietinum</i>          | cDNA clone          | Experimental | NA |
| 1 | 2 | 14 | 5  | DY475254 | Wound-induced protein                                                  | <i>Cicer arietinum</i>          | cDNA clone          | Experimental | NA |
| 1 | 2 | 14 | 6  | DY475278 | Heat shock protein                                                     | <i>Cicer arietinum</i>          | cDNA clone          | Experimental | NA |
| 1 | 2 | 14 | 7  | DY475335 | Heat shock protein                                                     | <i>Cicer arietinum</i>          | cDNA clone          | Experimental | NA |
| 1 | 2 | 14 | 8  | DY475453 | Heat shock protein                                                     | <i>Cicer arietinum</i>          | cDNA clone          | Experimental | NA |
| 1 | 2 | 14 | 9  | DY475463 | Similarity to protein-tyrosine-kinase receptor (EC 2.7.1.112)          | <i>Cicer arietinum</i>          | cDNA clone          | Experimental | NA |
| 1 | 2 | 14 | 10 | DY475478 | Hypothetical transmembrane protein                                     | <i>Cicer arietinum</i>          | cDNA clone          | Experimental | NA |
| 1 | 2 | 14 | 11 | DY475525 | Actin regulating protein                                               | <i>Cicer arietinum</i>          | cDNA clone          | Experimental | NA |
| 1 | 2 | 14 | 12 | DY475068 | L-allo-threonine aldolase (EC 4.1.2.5)                                 | <i>Cicer arietinum</i>          | cDNA clone          | Experimental | NA |
| 1 | 2 | 14 | 13 | DY475105 | Sucrose synthase (EC 2.4.1.14)                                         | <i>Cicer arietinum</i>          | cDNA clone          | Experimental | NA |
| 1 | 2 | 14 | 14 | DY475108 | Asparagine synthetase (EC 6.3.5.4)                                     | <i>Cicer arietinum</i>          | cDNA clone          | Experimental | NA |
| 1 | 3 | 1  | 1  | DY396330 | Thioredoxin H-type 1                                                   | <i>Lathyrus sativus</i>         | cDNA clone          | Experimental | NA |
| 1 | 3 | 1  | 2  | DY396404 | Glutathione S-transferase GST 8                                        | <i>Lathyrus sativus</i>         | cDNA clone          | Experimental | NA |
| 1 | 3 | 1  | 3  | NA       | Copper amine oxidase                                                   | <i>Lens culinaris</i> (ILL7537) | Genomic PCR product | Experimental | NA |
| 1 | 3 | 1  | 4  | NA       | Isoflavone synthase                                                    | <i>Lens culinaris</i> (ILL7537) | Genomic PCR product | Experimental | NA |
| 1 | 3 | 1  | 5  | NA       | NBS-LRR putative RGA Aj516060                                          | <i>Lens culinaris</i> (ILL6002) | Genomic PCR product | Experimental | NA |
| 1 | 3 | 1  | 6  | NA       | NBS-LRR putative RGA Aj516062                                          | <i>Lens culinaris</i> (ILL6002) | Genomic PCR product | Experimental | NA |

|   |   |   |    |          |                                                     |                                 |                     |              |               |
|---|---|---|----|----------|-----------------------------------------------------|---------------------------------|---------------------|--------------|---------------|
| 1 | 3 | 1 | 7  | NA       | NBS-LRR putative RGA Aj516064                       | <i>Lens culinaris</i> (ILL6002) | Genomic PCR product | Experimental | NA            |
| 1 | 3 | 1 | 8  | NA       | NBS-LRR putative RGA Aj516067                       | <i>Lens culinaris</i> (ILL6002) | Genomic PCR product | Experimental | NA            |
| 1 | 3 | 1 | 9  | NA       | NBS-LRR putative RGA Aj516072                       | <i>Lens culinaris</i> (ILL6002) | Genomic PCR product | Experimental | NA            |
| 1 | 3 | 1 | 10 | NA       | NBS-LRR putative RGA Aj516076                       | <i>Lens culinaris</i> (ILL6002) | Genomic PCR product | Experimental | NA            |
| 1 | 3 | 2 | 1  | DY396354 | Polyubiquitin                                       | <i>Lathyrus sativus</i>         | cDNA clone          | Experimental | NA            |
| 1 | 3 | 2 | 2  | DY396413 | Catalase                                            | <i>Lathyrus sativus</i>         | cDNA clone          | Experimental | NA            |
| 1 | 3 | 2 | 3  | DY396383 | Putative extracellular dermal glycoprotein          | <i>Lathyrus sativus</i>         | cDNA clone          | Experimental | NA            |
| 1 | 3 | 2 | 4  | DY396377 | Ripening-related protein                            | <i>Lathyrus sativus</i>         | cDNA clone          | Experimental | NA            |
| 1 | 3 | 2 | 5  | DY396373 | Metallothionein-like protein 1                      | <i>Lathyrus sativus</i>         | cDNA clone          | Experimental | NA            |
| 1 | 3 | 2 | 6  | DY396370 | Ubiquitin-conjugating enzyme E2                     | <i>Lathyrus sativus</i>         | cDNA clone          | Experimental | NA            |
| 1 | 3 | 2 | 7  | DY396412 | Poly(A)-binding protein                             | <i>Lathyrus sativus</i>         | cDNA clone          | Experimental | NA            |
| 1 | 3 | 2 | 8  | DY396408 | Ubiquitin-specific protease 16                      | <i>Lathyrus sativus</i>         | cDNA clone          | Experimental | NA            |
| 1 | 3 | 2 | 9  | DY396284 | Histone deacetylase 2 isoform B                     | <i>Lathyrus sativus</i>         | cDNA clone          | Experimental | NA            |
| 1 | 3 | 2 | 10 | DY396287 | Kinesin-like protein                                | <i>Lathyrus sativus</i>         | cDNA clone          | Experimental | NA            |
| 1 | 3 | 2 | 11 | DY396280 | Serine carboxypeptidase isolag                      | <i>Lathyrus sativus</i>         | cDNA clone          | Experimental | NA            |
| 1 | 3 | 2 | 12 | DY396396 | Cysteine proteinase 15A precursor                   | <i>Lathyrus sativus</i>         | cDNA clone          | Experimental | NA            |
| 1 | 3 | 2 | 13 | DY396348 | Glycolate oxidase                                   | <i>Lathyrus sativus</i>         | cDNA clone          | Experimental | NA            |
| 1 | 3 | 2 | 14 | DY396435 | L-ascorbate peroxidase cytosolic                    | <i>Lathyrus sativus</i>         | cDNA clone          | Experimental | NA            |
| 1 | 3 | 3 | 1  | DY396375 | Putative protein kinase                             | <i>Lathyrus sativus</i>         | cDNA clone          | Experimental | NA            |
| 1 | 3 | 3 | 2  | DY396381 | Small GTP-binding protein                           | <i>Lathyrus sativus</i>         | cDNA clone          | Experimental | NA            |
| 1 | 3 | 3 | 3  | DY396388 | Pathogenesis-related protein 4A                     | <i>Lathyrus sativus</i>         | cDNA clone          | Experimental | NA            |
| 1 | 3 | 3 | 4  | DY396385 | TMV resistance protein-like                         | <i>Lathyrus sativus</i>         | cDNA clone          | Experimental | NA            |
| 1 | 3 | 3 | 5  | DY396390 | Disease resistance response protein 230 (DRR2230-a) | <i>Lathyrus sativus</i>         | cDNA clone          | Experimental | NA            |
| 1 | 3 | 3 | 6  | DY396393 | 6-Phosphogluconate dehydrogenase                    | <i>Lathyrus sativus</i>         | cDNA clone          | Experimental | NA            |
| 1 | 3 | 3 | 7  | DY396303 | Ubiquitin-like protein                              | <i>Lathyrus sativus</i>         | cDNA clone          | Experimental | NA            |
| 1 | 3 | 3 | 8  | DY396298 | Environmental stress inducible protein              | <i>Lathyrus sativus</i>         | cDNA clone          | Experimental | NA            |
| 1 | 3 | 3 | 9  | DY396295 | Metallothionein-like protein                        | <i>Lathyrus sativus</i>         | cDNA clone          | Experimental | NA            |
| 1 | 3 | 3 | 10 | DY396278 | Ubiquitin                                           | <i>Lathyrus sativus</i>         | cDNA clone          | Experimental | NA            |
| 1 | 3 | 3 | 11 | DY396263 | Transcription factor NTLIM1                         | <i>Lathyrus sativus</i>         | cDNA clone          | Experimental | NA            |
| 1 | 3 | 3 | 12 | DY396321 | Dehydration stress-induced protein                  | <i>Lathyrus sativus</i>         | cDNA clone          | Experimental | NA            |
| 1 | 3 | 3 | 13 | DY396319 | Polyubiquitin                                       | <i>Lathyrus sativus</i>         | cDNA clone          | Experimental | NA            |
| 1 | 3 | 3 | 14 | DY396315 | Auxin-responsive protein IAA9                       | <i>Lathyrus sativus</i>         | cDNA clone          | Experimental | NA            |
| 1 | 3 | 4 | 1  | DY475542 | 18S rRNA                                            | <i>Cicer arietinum</i>          | cDNA clone          | Experimental | NA            |
| 1 | 3 | 4 | 2  | EB085056 | Beta-galactosidase (EC 3.2.1.23)                    | <i>Cicer arietinum</i>          | cDNA clone          | Experimental | NA            |
| 1 | 3 | 4 | 3  | EB085057 | Unknown                                             | <i>Cicer arietinum</i>          | cDNA clone          | Experimental | NA            |
| 1 | 3 | 4 | 4  | NA       | Normalisation control 1                             | <i>Cicer arietinum</i>          | cDNA clone          | Control      | Normalisation |

|   |   |   |    |          |                                                           |                         |            |              |    |
|---|---|---|----|----------|-----------------------------------------------------------|-------------------------|------------|--------------|----|
| 1 | 3 | 4 | 5  | DY396285 | Protein kinase C inhibitor-like protein                   | <i>Lathyrus sativus</i> | cDNA clone | Experimental | NA |
| 1 | 3 | 4 | 6  | DY396291 | Putative ARF1 GTPase activating protein                   | <i>Lathyrus sativus</i> | cDNA clone | Experimental | NA |
| 1 | 3 | 4 | 7  | DY396294 | Putative steroid binding protein                          | <i>Lathyrus sativus</i> | cDNA clone | Experimental | NA |
| 1 | 3 | 4 | 8  | DY396297 | Isovaleryl-coa dehydrogenase                              | <i>Lathyrus sativus</i> | cDNA clone | Experimental | NA |
| 1 | 3 | 4 | 9  | DY396300 | ATHP3 (histidine-containing phosphotransfer protein like) | <i>Lathyrus sativus</i> | cDNA clone | Experimental | NA |
| 1 | 3 | 4 | 10 | DY396304 | Putative steroid binding protein                          | <i>Lathyrus sativus</i> | cDNA clone | Experimental | NA |
| 1 | 3 | 4 | 11 | DY396307 | Serine/threonine protein kinase                           | <i>Lathyrus sativus</i> | cDNA clone | Experimental | NA |
| 1 | 3 | 4 | 12 | DY396313 | Guanine nucleotide regulatory protein                     | <i>Lathyrus sativus</i> | cDNA clone | Experimental | NA |
| 1 | 3 | 4 | 13 | DY396367 | Small GTP-binding protein                                 | <i>Lathyrus sativus</i> | cDNA clone | Experimental | NA |
| 1 | 3 | 4 | 14 | DY396372 | Pathogenesis-related protein 4A                           | <i>Lathyrus sativus</i> | cDNA clone | Experimental | NA |
| 1 | 3 | 5 | 1  | EB085020 | Unknown                                                   | <i>Cicer arietinum</i>  | cDNA clone | Experimental | NA |
| 1 | 3 | 5 | 2  | EB085022 | Unknown                                                   | <i>Cicer arietinum</i>  | cDNA clone | Experimental | NA |
| 1 | 3 | 5 | 3  | NA       | Unknown                                                   | <i>Cicer arietinum</i>  | cDNA clone | Experimental | NA |
| 1 | 3 | 5 | 4  | EB085040 | Unknown                                                   | <i>Cicer arietinum</i>  | cDNA clone | Experimental | NA |
| 1 | 3 | 5 | 5  | NA       | Unknown                                                   | <i>Cicer arietinum</i>  | cDNA clone | Experimental | NA |
| 1 | 3 | 5 | 6  | EB085041 | Unknown                                                   | <i>Cicer arietinum</i>  | cDNA clone | Experimental | NA |
| 1 | 3 | 5 | 7  | EB085042 | Phosphate-induced protein                                 | <i>Cicer arietinum</i>  | cDNA clone | Experimental | NA |
| 1 | 3 | 5 | 8  | EB085044 | Unknown                                                   | <i>Cicer arietinum</i>  | cDNA clone | Experimental | NA |
| 1 | 3 | 5 | 9  | DY475558 | Unknown                                                   | <i>Cicer arietinum</i>  | cDNA clone | Experimental | NA |
| 1 | 3 | 5 | 10 | NA       | Unknown                                                   | <i>Cicer arietinum</i>  | cDNA clone | Experimental | NA |
| 1 | 3 | 5 | 11 | EB085052 | Unknown                                                   | <i>Cicer arietinum</i>  | cDNA clone | Experimental | NA |
| 1 | 3 | 5 | 12 | EB085064 | Unknown                                                   | <i>Cicer arietinum</i>  | cDNA clone | Experimental | NA |
| 1 | 3 | 5 | 13 | EB085054 | Chloroplast DNA                                           | <i>Cicer arietinum</i>  | cDNA clone | Experimental | NA |
| 1 | 3 | 5 | 14 | DY475541 | Chloroplast DNA                                           | <i>Cicer arietinum</i>  | cDNA clone | Experimental | NA |
| 1 | 3 | 6 | 1  | DY475531 | Unclear                                                   | <i>Cicer arietinum</i>  | cDNA clone | Experimental | NA |
| 1 | 3 | 6 | 2  | EB085015 | Translational activator                                   | <i>Cicer arietinum</i>  | cDNA clone | Experimental | NA |
| 1 | 3 | 6 | 3  | EB085016 | Unknown                                                   | <i>Cicer arietinum</i>  | cDNA clone | Experimental | NA |
| 1 | 3 | 6 | 4  | EB085017 | Unclear                                                   | <i>Cicer arietinum</i>  | cDNA clone | Experimental | NA |
| 1 | 3 | 6 | 5  | NA       | Unknown                                                   | <i>Cicer arietinum</i>  | cDNA clone | Experimental | NA |
| 1 | 3 | 6 | 6  | NA       | Unknown                                                   | <i>Cicer arietinum</i>  | cDNA clone | Experimental | NA |
| 1 | 3 | 6 | 7  | DY475556 | NADH-plastoquinone oxidoreductase chain 1                 | <i>Cicer arietinum</i>  | cDNA clone | Experimental | NA |
| 1 | 3 | 6 | 8  | EB085063 | Unknown                                                   | <i>Cicer arietinum</i>  | cDNA clone | Experimental | NA |
| 1 | 3 | 6 | 9  | NA       | Unknown                                                   | <i>Cicer arietinum</i>  | cDNA clone | Experimental | NA |
| 1 | 3 | 6 | 10 | EB085018 | Acyl-activating enzyme                                    | <i>Cicer arietinum</i>  | cDNA clone | Experimental | NA |
| 1 | 3 | 6 | 11 | EB085034 | Unknown                                                   | <i>Cicer arietinum</i>  | cDNA clone | Experimental | NA |
| 1 | 3 | 6 | 12 | EB085035 | Unknown                                                   | <i>Cicer arietinum</i>  | cDNA clone | Experimental | NA |

|   |   |   |    |          |                                        |                        |            |              |    |
|---|---|---|----|----------|----------------------------------------|------------------------|------------|--------------|----|
| 1 | 3 | 6 | 13 | DY475537 | Chloroplast Val-tRNA                   | <i>Cicer arietinum</i> | cDNA clone | Experimental | NA |
| 1 | 3 | 6 | 14 | DY475555 | Chlorophyll <i>a/b</i> binding protein | <i>Cicer arietinum</i> | cDNA clone | Experimental | NA |
| 1 | 3 | 7 | 1  | DY475351 | Unknown                                | <i>Cicer arietinum</i> | cDNA clone | Experimental | NA |
| 1 | 3 | 7 | 2  | DY475356 | Unknown                                | <i>Cicer arietinum</i> | cDNA clone | Experimental | NA |
| 1 | 3 | 7 | 3  | DY475362 | Unknown                                | <i>Cicer arietinum</i> | cDNA clone | Experimental | NA |
| 1 | 3 | 7 | 4  | DY475364 | Unknown                                | <i>Cicer arietinum</i> | cDNA clone | Experimental | NA |
| 1 | 3 | 7 | 5  | DY475366 | Unknown                                | <i>Cicer arietinum</i> | cDNA clone | Experimental | NA |
| 1 | 3 | 7 | 6  | DY475370 | Unknown                                | <i>Cicer arietinum</i> | cDNA clone | Experimental | NA |
| 1 | 3 | 7 | 7  | DY475437 | Unknown                                | <i>Cicer arietinum</i> | cDNA clone | Experimental | NA |
| 1 | 3 | 7 | 8  | DY475445 | Unknown                                | <i>Cicer arietinum</i> | cDNA clone | Experimental | NA |
| 1 | 3 | 7 | 9  | DY475451 | Unknown                                | <i>Cicer arietinum</i> | cDNA clone | Experimental | NA |
| 1 | 3 | 7 | 10 | DY475461 | Unknown                                | <i>Cicer arietinum</i> | cDNA clone | Experimental | NA |
| 1 | 3 | 7 | 11 | DY475469 | Unknown                                | <i>Cicer arietinum</i> | cDNA clone | Experimental | NA |
| 1 | 3 | 7 | 12 | DY475476 | Unknown                                | <i>Cicer arietinum</i> | cDNA clone | Experimental | NA |
| 1 | 3 | 7 | 13 | DY475482 | Unknown                                | <i>Cicer arietinum</i> | cDNA clone | Experimental | NA |
| 1 | 3 | 7 | 14 | DY475484 | Unknown                                | <i>Cicer arietinum</i> | cDNA clone | Experimental | NA |
| 1 | 3 | 8 | 1  | DY475177 | Unknown                                | <i>Cicer arietinum</i> | cDNA clone | Experimental | NA |
| 1 | 3 | 8 | 2  | DY475185 | Unknown                                | <i>Cicer arietinum</i> | cDNA clone | Experimental | NA |
| 1 | 3 | 8 | 3  | DY475189 | Unknown                                | <i>Cicer arietinum</i> | cDNA clone | Experimental | NA |
| 1 | 3 | 8 | 4  | DY475193 | Unknown                                | <i>Cicer arietinum</i> | cDNA clone | Experimental | NA |
| 1 | 3 | 8 | 5  | DY475263 | Unknown                                | <i>Cicer arietinum</i> | cDNA clone | Experimental | NA |
| 1 | 3 | 8 | 6  | DY475270 | Unknown                                | <i>Cicer arietinum</i> | cDNA clone | Experimental | NA |
| 1 | 3 | 8 | 7  | DY475277 | Unknown                                | <i>Cicer arietinum</i> | cDNA clone | Experimental | NA |
| 1 | 3 | 8 | 8  | DY475280 | Unknown                                | <i>Cicer arietinum</i> | cDNA clone | Experimental | NA |
| 1 | 3 | 8 | 9  | DY475283 | Unknown                                | <i>Cicer arietinum</i> | cDNA clone | Experimental | NA |
| 1 | 3 | 8 | 10 | DY475289 | Unknown                                | <i>Cicer arietinum</i> | cDNA clone | Experimental | NA |
| 1 | 3 | 8 | 11 | DY475293 | Unknown                                | <i>Cicer arietinum</i> | cDNA clone | Experimental | NA |
| 1 | 3 | 8 | 12 | DY475296 | Unknown                                | <i>Cicer arietinum</i> | cDNA clone | Experimental | NA |
| 1 | 3 | 8 | 13 | DY475343 | Unknown                                | <i>Cicer arietinum</i> | cDNA clone | Experimental | NA |
| 1 | 3 | 8 | 14 | DY475349 | Unknown                                | <i>Cicer arietinum</i> | cDNA clone | Experimental | NA |
| 1 | 3 | 9 | 1  | DY475329 | Unclear                                | <i>Cicer arietinum</i> | cDNA clone | Experimental | NA |
| 1 | 3 | 9 | 2  | DY475355 | Unclear                                | <i>Cicer arietinum</i> | cDNA clone | Experimental | NA |
| 1 | 3 | 9 | 3  | DY475515 | Unclear                                | <i>Cicer arietinum</i> | cDNA clone | Experimental | NA |
| 1 | 3 | 9 | 4  | DY475526 | Unclear                                | <i>Cicer arietinum</i> | cDNA clone | Experimental | NA |
| 1 | 3 | 9 | 5  | DY475048 | Unknown                                | <i>Cicer arietinum</i> | cDNA clone | Experimental | NA |
| 1 | 3 | 9 | 6  | DY475055 | Unknown                                | <i>Cicer arietinum</i> | cDNA clone | Experimental | NA |

|   |   |    |    |          |                                                                                                    |                        |            |              |    |
|---|---|----|----|----------|----------------------------------------------------------------------------------------------------|------------------------|------------|--------------|----|
| 1 | 3 | 9  | 7  | DY475061 | Unknown                                                                                            | <i>Cicer arietinum</i> | cDNA clone | Experimental | NA |
| 1 | 3 | 9  | 8  | DY475064 | Unknown                                                                                            | <i>Cicer arietinum</i> | cDNA clone | Experimental | NA |
| 1 | 3 | 9  | 9  | DY475075 | Unknown                                                                                            | <i>Cicer arietinum</i> | cDNA clone | Experimental | NA |
| 1 | 3 | 9  | 10 | DY475080 | Unknown                                                                                            | <i>Cicer arietinum</i> | cDNA clone | Experimental | NA |
| 1 | 3 | 9  | 11 | DY475158 | Unknown                                                                                            | <i>Cicer arietinum</i> | cDNA clone | Experimental | NA |
| 1 | 3 | 9  | 12 | DY475160 | Unknown                                                                                            | <i>Cicer arietinum</i> | cDNA clone | Experimental | NA |
| 1 | 3 | 9  | 13 | DY475166 | Unknown                                                                                            | <i>Cicer arietinum</i> | cDNA clone | Experimental | NA |
| 1 | 3 | 9  | 14 | DY475168 | Unknown                                                                                            | <i>Cicer arietinum</i> | cDNA clone | Experimental | NA |
| 1 | 3 | 10 | 1  | DY475239 | Membrane sugar-transport protein                                                                   | <i>Cicer arietinum</i> | cDNA clone | Experimental | NA |
| 1 | 3 | 10 | 2  | DY475424 | Beta adaptin like protein                                                                          | <i>Cicer arietinum</i> | cDNA clone | Experimental | NA |
| 1 | 3 | 10 | 3  | DY475468 | Cyclic ion channel protein                                                                         | <i>Cicer arietinum</i> | cDNA clone | Experimental | NA |
| 1 | 3 | 10 | 4  | DY475512 | Aquaporin 2 protein                                                                                | <i>Cicer arietinum</i> | cDNA clone | Experimental | NA |
| 1 | 3 | 10 | 5  | DY475053 | Unclear                                                                                            | <i>Cicer arietinum</i> | cDNA clone | Experimental | NA |
| 1 | 3 | 10 | 6  | DY475071 | Unclear                                                                                            | <i>Cicer arietinum</i> | cDNA clone | Experimental | NA |
| 1 | 3 | 10 | 7  | DY475095 | Unclear                                                                                            | <i>Cicer arietinum</i> | cDNA clone | Experimental | NA |
| 1 | 3 | 10 | 8  | DY475099 | Unclear                                                                                            | <i>Cicer arietinum</i> | cDNA clone | Experimental | NA |
| 1 | 3 | 10 | 9  | DY475262 | Unclear                                                                                            | <i>Cicer arietinum</i> | cDNA clone | Experimental | NA |
| 1 | 3 | 10 | 10 | DY475265 | Unclear                                                                                            | <i>Cicer arietinum</i> | cDNA clone | Experimental | NA |
| 1 | 3 | 10 | 11 | DY475273 | Unclear                                                                                            | <i>Cicer arietinum</i> | cDNA clone | Experimental | NA |
| 1 | 3 | 10 | 12 | DY475284 | Unclear                                                                                            | <i>Cicer arietinum</i> | cDNA clone | Experimental | NA |
| 1 | 3 | 10 | 13 | DY475313 | Unclear                                                                                            | <i>Cicer arietinum</i> | cDNA clone | Experimental | NA |
| 1 | 3 | 10 | 14 | DY475322 | Unclear                                                                                            | <i>Cicer arietinum</i> | cDNA clone | Experimental | NA |
| 1 | 3 | 11 | 1  | DY475501 | Chloroplast DNA for P700 chlorophyll a-apoproteins                                                 | <i>Cicer arietinum</i> | cDNA clone | Experimental | NA |
| 1 | 3 | 11 | 2  | DY475050 | Chloroplast 30S ribosomal protein S3                                                               | <i>Cicer arietinum</i> | cDNA clone | Experimental | NA |
| 1 | 3 | 11 | 3  | DY475073 | 40S ribosomal protein S3                                                                           | <i>Cicer arietinum</i> | cDNA clone | Experimental | NA |
| 1 | 3 | 11 | 4  | DY475110 | 60S ribosomal protein L17                                                                          | <i>Cicer arietinum</i> | cDNA clone | Experimental | NA |
| 1 | 3 | 11 | 5  | DY475120 | 40S ribosomal protein S18                                                                          | <i>Cicer arietinum</i> | cDNA clone | Experimental | NA |
| 1 | 3 | 11 | 6  | DY475123 | 60S ribosomal protein L10                                                                          | <i>Cicer arietinum</i> | cDNA clone | Experimental | NA |
| 1 | 3 | 11 | 7  | DY475421 | Acidic 60s ribosomal protein                                                                       | <i>Cicer arietinum</i> | cDNA clone | Experimental | NA |
| 1 | 3 | 11 | 8  | DY475429 | 50S ribosomal protein L7Ae                                                                         | <i>Cicer arietinum</i> | cDNA clone | Experimental | NA |
| 1 | 3 | 11 | 9  | DY475479 | Serine:glyoxylate aminotransferase (EC 2.6.1.45)/alanine:glyoxylate aminotransferase (EC 2.6.1.44) | <i>Cicer arietinum</i> | cDNA clone | Experimental | NA |
| 1 | 3 | 11 | 10 | DY475504 | S29 ribosomal protein                                                                              | <i>Cicer arietinum</i> | cDNA clone | Experimental | NA |
| 1 | 3 | 11 | 11 | DY475507 | Anthranilate phosphoribosyltransferase-like protein (EC 2.4.2.18)                                  | <i>Cicer arietinum</i> | cDNA clone | Experimental | NA |

|   |   |    |    |          |                                                                        |                        |            |              |    |
|---|---|----|----|----------|------------------------------------------------------------------------|------------------------|------------|--------------|----|
| 1 | 3 | 11 | 12 | DY475511 | Histidine-containing phosphotransferprotein                            | <i>Cicer arietinum</i> | cDNA clone | Experimental | NA |
| 1 | 3 | 11 | 13 | DY475087 | Mitochondrial 26S rRNA                                                 | <i>Cicer arietinum</i> | cDNA clone | Experimental | NA |
| 1 | 3 | 11 | 14 | DY475544 | Chloroplast 4.5S, 5S, 16S and 23S mRNA                                 | <i>Cicer arietinum</i> | cDNA clone | Experimental | NA |
| 1 | 3 | 12 | 1  | DY475516 | Cytochrome C oxidase subunit                                           | <i>Cicer arietinum</i> | cDNA clone | Experimental | NA |
| 1 | 3 | 12 | 2  | CV793595 | Caffeoyl-CoA-Methyltransferase                                         | <i>Cicer arietinum</i> | cDNA clone | Experimental | NA |
| 1 | 3 | 12 | 3  | CV793589 | Homology to an Avr9/Cf9 rapidly elicited protein from <i>N.tabacum</i> | <i>Cicer arietinum</i> | cDNA clone | Experimental | NA |
| 1 | 3 | 12 | 4  | CV793591 | S1-3 protein homolog induced by CMV infection in cowpea                | <i>Cicer arietinum</i> | cDNA clone | Experimental | NA |
| 1 | 3 | 12 | 5  | DY475052 | Oxygen splitting enhancer protein of photosystem II                    | <i>Cicer arietinum</i> | cDNA clone | Experimental | NA |
| 1 | 3 | 12 | 6  | DY475060 | Oxygen splitting enhancer protein of photosystem II                    | <i>Cicer arietinum</i> | cDNA clone | Experimental | NA |
| 1 | 3 | 12 | 7  | DY475082 | ATP synthase (EC 3.6.1.34)                                             | <i>Cicer arietinum</i> | cDNA clone | Experimental | NA |
| 1 | 3 | 12 | 8  | DY475116 | Photosystem II reaction centre I protein                               | <i>Cicer arietinum</i> | cDNA clone | Experimental | NA |
| 1 | 3 | 12 | 9  | DY475129 | mRNA for light inducible protein precursor of photosystem II           | <i>Cicer arietinum</i> | cDNA clone | Experimental | NA |
| 1 | 3 | 12 | 10 | DY475139 | NADH dehydrogenase subunit/NADH-Plastoquinone oxidoreductase subunit   | <i>Cicer arietinum</i> | cDNA clone | Experimental | NA |
| 1 | 3 | 12 | 11 | DY475144 | Chloroplast psbB operon                                                | <i>Cicer arietinum</i> | cDNA clone | Experimental | NA |
| 1 | 3 | 12 | 12 | DY475151 | Chlorophyll <i>a/b</i> binding protein                                 | <i>Cicer arietinum</i> | cDNA clone | Experimental | NA |
| 1 | 3 | 12 | 13 | DY475464 | ATP Synthase C chain (lipid binding protein) (EC 3.6.1.34)             | <i>Cicer arietinum</i> | cDNA clone | Experimental | NA |
| 1 | 3 | 12 | 14 | DY475487 | Ferredoxin                                                             | <i>Cicer arietinum</i> | cDNA clone | Experimental | NA |
| 1 | 3 | 13 | 1  | DY475384 | Serine/threonine protein kinase                                        | <i>Cicer arietinum</i> | cDNA clone | Experimental | NA |
| 1 | 3 | 13 | 2  | DY475410 | Multispanning membrane protein                                         | <i>Cicer arietinum</i> | cDNA clone | Experimental | NA |
| 1 | 3 | 13 | 3  | DY475170 | S-adenosylmethionine decarboxylase (EC 4.1.1.50)                       | <i>Cicer arietinum</i> | cDNA clone | Experimental | NA |
| 1 | 3 | 13 | 4  | DY475180 | Cytochrome F                                                           | <i>Cicer arietinum</i> | cDNA clone | Experimental | NA |
| 1 | 3 | 13 | 5  | DY475184 | Carboxytransferase                                                     | <i>Cicer arietinum</i> | cDNA clone | Experimental | NA |
| 1 | 3 | 13 | 6  | DY475200 | Nodulin 21 protein                                                     | <i>Cicer arietinum</i> | cDNA clone | Experimental | NA |
| 1 | 3 | 13 | 7  | DY475213 | Carbonic anhydrase (EC 4.2.1.1)                                        | <i>Cicer arietinum</i> | cDNA clone | Experimental | NA |
| 1 | 3 | 13 | 8  | DY475221 | UDP-glucose 4-epimerase (EC 5.1.3.2)                                   | <i>Cicer arietinum</i> | cDNA clone | Experimental | NA |
| 1 | 3 | 13 | 9  | DY475242 | Thiazole biosynthetic enzyme                                           | <i>Cicer arietinum</i> | cDNA clone | Experimental | NA |
| 1 | 3 | 13 | 10 | DY475282 | Trehalose-phosphatase (EC 3.1.3.12)                                    | <i>Cicer arietinum</i> | cDNA clone | Experimental | NA |
| 1 | 3 | 13 | 11 | DY475449 | Cytochrome P450                                                        | <i>Cicer arietinum</i> | cDNA clone | Experimental | NA |
| 1 | 3 | 13 | 12 | DY475458 | Cysteine proteinase                                                    | <i>Cicer arietinum</i> | cDNA clone | Experimental | NA |
| 1 | 3 | 13 | 13 | DY475477 | Asparagine synthetase (glutamine hydrolysing) (EC 6.3.5.4)             | <i>Cicer arietinum</i> | cDNA clone | Experimental | NA |
| 1 | 3 | 13 | 14 | DY475498 | Glucosyltransferase                                                    | <i>Cicer arietinum</i> | cDNA clone | Experimental | NA |
| 1 | 3 | 14 | 1  | DY475227 | Myosin heavy-chain protein                                             | <i>Cicer arietinum</i> | cDNA clone | Experimental | NA |



|   |   |    |    |          |                                                          |                                 |                     |              |          |
|---|---|----|----|----------|----------------------------------------------------------|---------------------------------|---------------------|--------------|----------|
| 1 | 3 | 14 | 2  | DY475266 | DNA binding protein                                      | <i>Cicer arietinum</i>          | cDNA clone          | Experimental | NA       |
| 1 | 3 | 14 | 3  | DY475357 | RNA/ssDNA binding protein                                | <i>Cicer arietinum</i>          | cDNA clone          | Experimental | NA       |
| 1 | 3 | 14 | 4  | DY475493 | Formyltetrahydrofolate deformylase-like (EC 3.5.1.10)    | <i>Cicer arietinum</i>          | cDNA clone          | Experimental | NA       |
| 1 | 3 | 14 | 5  | DY475070 | Dehydration-induced protein                              | <i>Cicer arietinum</i>          | cDNA clone          | Experimental | NA       |
| 1 | 3 | 14 | 6  | DY475078 | Auxin-repressed protein                                  | <i>Cicer arietinum</i>          | cDNA clone          | Experimental | NA       |
| 1 | 3 | 14 | 7  | DY475111 | Wound-induced protein                                    | <i>Cicer arietinum</i>          | cDNA clone          | Experimental | NA       |
| 1 | 3 | 14 | 8  | DY475138 | Aluminium-induced protein                                | <i>Cicer arietinum</i>          | cDNA clone          | Experimental | NA       |
| 1 | 3 | 14 | 9  | DY475517 | Farnesylated/isoprenylated protein                       | <i>Cicer arietinum</i>          | cDNA clone          | Experimental | NA       |
| 1 | 3 | 14 | 10 | DY475091 | Zinc finger protein                                      | <i>Cicer arietinum</i>          | cDNA clone          | Experimental | NA       |
| 1 | 3 | 14 | 11 | DY475119 | Membrane-related protein CP5                             | <i>Cicer arietinum</i>          | cDNA clone          | Experimental | NA       |
| 1 | 3 | 14 | 12 | DY475246 | GPI-anchored membrane protein                            | <i>Cicer arietinum</i>          | cDNA clone          | Experimental | NA       |
| 1 | 3 | 14 | 13 | DY475271 | Histidine-rich glycoprotein precursor                    | <i>Cicer arietinum</i>          | cDNA clone          | Experimental | NA       |
| 1 | 3 | 14 | 14 | DY475348 | Proline-rich structural protein                          | <i>Cicer arietinum</i>          | cDNA clone          | Experimental | NA       |
| 1 | 4 | 1  | 1  | NA       | NBS-LRR putative RGA Aj516082                            | <i>Lens culinaris</i> (ILL7537) | Genomic PCR product | Experimental | NA       |
| 1 | 4 | 1  | 2  | NA       | NBS-LRR putative RGA Aj516087                            | <i>Lens culinaris</i> (ILL7537) | Genomic PCR product | Experimental | NA       |
| 1 | 4 | 1  | 3  | NA       | NBS-LRR putative RGA Aj516082                            | <i>Lens culinaris</i> (ILL6002) | Genomic PCR product | Experimental | NA       |
| 1 | 4 | 1  | 4  | NA       | NBS-LRR putative RGA Aj516087                            | <i>Lens culinaris</i> (ILL6002) | Genomic PCR product | Experimental | NA       |
| 1 | 4 | 1  | 5  | NA       | NBS-LRR putative RGA Aj516090                            | <i>Lens culinaris</i> (ILL6002) | Genomic PCR product | Experimental | NA       |
| 1 | 4 | 1  | 6  | NA       | Lipoxygenase                                             | <i>Lens culinaris</i> (ILL6002) | Genomic PCR product | Experimental | NA       |
| 1 | 4 | 1  | 7  | NA       | NBS-LRR putative RGA LRI                                 | <i>Lens culinaris</i> (ILL6002) | Genomic PCR product | Experimental | NA       |
| 1 | 4 | 1  | 8  | NA       | Printing Control                                         | <i>Lens culinaris</i> (ILL6002) | Genomic PCR product | Experimental | NA       |
| 1 | 4 | 1  | 9  | NA       | Blank                                                    | NA                              | Oligo               | Control      | Printing |
| 1 | 4 | 1  | 10 | NA       | Blank                                                    | NA                              | Blank               | Control      | Negative |
| 1 | 4 | 2  | 1  | DY396403 | Ubiquitin-carboxyl extension                             | <i>Lathyrus sativus</i>         | cDNA clone          | Control      | Negative |
| 1 | 4 | 2  | 2  | DY396401 | Ubiquitin-cytochrome C reductase complex 6.7 KDA protein | <i>Lathyrus sativus</i>         | cDNA clone          | Experimental | NA       |
| 1 | 4 | 2  | 3  | DY396397 | Heat shock protein DNAJ homolog                          | <i>Lathyrus sativus</i>         | cDNA clone          | Experimental | NA       |
| 1 | 4 | 2  | 4  | DY396268 | Histone H2A                                              | <i>Lathyrus sativus</i>         | cDNA clone          | Experimental | NA       |
| 1 | 4 | 2  | 5  | DY396266 | Nucleic acid binding protein-like                        | <i>Lathyrus sativus</i>         | cDNA clone          | Experimental | NA       |
| 1 | 4 | 2  | 6  | DY396424 | Ubiquitin                                                | <i>Lathyrus sativus</i>         | cDNA clone          | Experimental | NA       |
| 1 | 4 | 2  | 7  | DY396417 | Glycogen synthase kinase-3 homolog MSK-3                 | <i>Lathyrus sativus</i>         | cDNA clone          | Experimental | NA       |
| 1 | 4 | 2  | 8  | DY396308 | Xyloglucan endotransglycosylase LEXET2                   | <i>Lathyrus sativus</i>         | cDNA clone          | Experimental | NA       |
| 1 | 4 | 2  | 9  | NA       | NBS-LRR putative RGA Aj516060                            | <i>Lens culinaris</i> (ILL7537) | Genomic PCR product | Experimental | NA       |
| 1 | 4 | 2  | 10 | NA       | NBS-LRR putative RGA Aj516063                            | <i>Lens culinaris</i> (ILL7537) | Genomic PCR product | Experimental | NA       |
| 1 | 4 | 2  | 11 | NA       | NBS-LRR putative RGA Aj516065                            | <i>Lens culinaris</i> (ILL7537) | Genomic PCR product | Experimental | NA       |
| 1 | 4 | 2  | 12 | NA       | NBS-LRR putative RGA Aj516070                            | <i>Lens culinaris</i> (ILL7537) | Genomic PCR product | Experimental | NA       |

|   |   |   |    |          |                                                   |                                 |                     |              |    |
|---|---|---|----|----------|---------------------------------------------------|---------------------------------|---------------------|--------------|----|
| 1 | 4 | 2 | 13 | NA       | NBS-LRR putative RGA Aj516072                     | <i>Lens culinaris</i> (ILL7537) | Genomic PCR product | Experimental | NA |
| 1 | 4 | 2 | 14 | NA       | NBS-LRR putative RGA Aj516076                     | <i>Lens culinaris</i> (ILL7537) | Genomic PCR product | Experimental | NA |
| 1 | 4 | 3 | 1  | DY396415 | Caffeoyl-coa O-methyltransferase 4                | <i>Lathyrus sativus</i>         | cDNA clone          | Experimental | NA |
| 1 | 4 | 3 | 2  | DY396418 | Protein transport protein SEC61 gamma subunit     | <i>Lathyrus sativus</i>         | cDNA clone          | Experimental | NA |
| 1 | 4 | 3 | 3  | DY396425 | Disease resistance response protein 230 precursor | <i>Lathyrus sativus</i>         | cDNA clone          | Experimental | NA |
| 1 | 4 | 3 | 4  | DY396347 | Ripening-related protein                          | <i>Lathyrus sativus</i>         | cDNA clone          | Experimental | NA |
| 1 | 4 | 3 | 5  | DY396429 | Putative membrane related protein                 | <i>Lathyrus sativus</i>         | cDNA clone          | Experimental | NA |
| 1 | 4 | 3 | 6  | DY396273 | Putative senescence-associated protein            | <i>Lathyrus sativus</i>         | cDNA clone          | Experimental | NA |
| 1 | 4 | 3 | 7  | DY396309 | Transcription initiation protein SPT4 homolog 1   | <i>Lathyrus sativus</i>         | cDNA clone          | Experimental | NA |
| 1 | 4 | 3 | 8  | DY396344 | Ripening-related protein                          | <i>Lathyrus sativus</i>         | cDNA clone          | Experimental | NA |
| 1 | 4 | 3 | 9  | DY396341 | Polyubiquitin                                     | <i>Lathyrus sativus</i>         | cDNA clone          | Experimental | NA |
| 1 | 4 | 3 | 10 | DY396339 | Magnesium chelatase subunit                       | <i>Lathyrus sativus</i>         | cDNA clone          | Experimental | NA |
| 1 | 4 | 3 | 11 | DY396328 | Polyubiquitin                                     | <i>Lathyrus sativus</i>         | cDNA clone          | Experimental | NA |
| 1 | 4 | 3 | 12 | DY396324 | Dehydrin-cognate                                  | <i>Lathyrus sativus</i>         | cDNA clone          | Experimental | NA |
| 1 | 4 | 3 | 13 | DY396366 | Putative Ubiquitin protein                        | <i>Lathyrus sativus</i>         | cDNA clone          | Experimental | NA |
| 1 | 4 | 3 | 14 | DY396361 | Heat shock factor binding protein                 | <i>Lathyrus sativus</i>         | cDNA clone          | Experimental | NA |
| 1 | 4 | 4 | 1  | DY396264 | Protein kinase precursor-like                     | <i>Lathyrus sativus</i>         | cDNA clone          | Experimental | NA |
| 1 | 4 | 4 | 2  | DY396269 | Putative auxin-repressed protein                  | <i>Lathyrus sativus</i>         | cDNA clone          | Experimental | NA |
| 1 | 4 | 4 | 3  | DY396276 | Disease resistance response protein 39 precursor  | <i>Lathyrus sativus</i>         | cDNA clone          | Experimental | NA |
| 1 | 4 | 4 | 4  | DY396281 | Pathogenesis-related protein 4A                   | <i>Lathyrus sativus</i>         | cDNA clone          | Experimental | NA |
| 1 | 4 | 4 | 5  | DY396325 | Cutinase negative acting protein                  | <i>Lathyrus sativus</i>         | cDNA clone          | Experimental | NA |
| 1 | 4 | 4 | 6  | DY396332 | Lipid transfer protein                            | <i>Lathyrus sativus</i>         | cDNA clone          | Experimental | NA |
| 1 | 4 | 4 | 7  | DY396336 | RAC-GTP binding protein-like                      | <i>Lathyrus sativus</i>         | cDNA clone          | Experimental | NA |
| 1 | 4 | 4 | 8  | DY396343 | Pathogenesis-related protein                      | <i>Lathyrus sativus</i>         | cDNA clone          | Experimental | NA |
| 1 | 4 | 4 | 9  | DY396350 | Nonspecific lipid-transfer protein precursor      | <i>Lathyrus sativus</i>         | cDNA clone          | Experimental | NA |
| 1 | 4 | 4 | 10 | DY396352 | CF-9 resistance gene cluster                      | <i>Lathyrus sativus</i>         | cDNA clone          | Experimental | NA |
| 1 | 4 | 4 | 11 | DY396359 | Putative auxin-repressed protein                  | <i>Lathyrus sativus</i>         | cDNA clone          | Experimental | NA |
| 1 | 4 | 4 | 12 | DY396364 | ER66 protein/calmodulin binding protein           | <i>Lathyrus sativus</i>         | cDNA clone          | Experimental | NA |
| 1 | 4 | 4 | 13 | DY396400 | EREBP-4                                           | <i>Lathyrus sativus</i>         | cDNA clone          | Experimental | NA |
| 1 | 4 | 4 | 14 | DY396407 | Defence-related peptide 1                         | <i>Lathyrus sativus</i>         | cDNA clone          | Experimental | NA |
| 1 | 4 | 5 | 1  | EB085036 | Chloroplast 30S rRNA                              | <i>Cicer arietinum</i>          | cDNA clone          | Experimental | NA |
| 1 | 4 | 5 | 2  | NA       | Unknown                                           | <i>Cicer arietinum</i>          | cDNA clone          | Experimental | NA |
| 1 | 4 | 5 | 3  | EB085047 | 18S rRNA                                          | <i>Cicer arietinum</i>          | cDNA clone          | Experimental | NA |
| 1 | 4 | 5 | 4  | NA       | Unknown                                           | <i>Cicer arietinum</i>          | cDNA clone          | Experimental | NA |
| 1 | 4 | 5 | 5  | EB085048 | Unclear                                           | <i>Cicer arietinum</i>          | cDNA clone          | Experimental | NA |
| 1 | 4 | 5 | 6  | EB085049 | Unknown                                           | <i>Cicer arietinum</i>          | cDNA clone          | Experimental | NA |

|   |   |   |    |          |                                                                |                         |                  |              |               |
|---|---|---|----|----------|----------------------------------------------------------------|-------------------------|------------------|--------------|---------------|
| 1 | 4 | 5 | 7  | NA       | Unknown                                                        | <i>Cicer arietinum</i>  | cDNA clone       | Experimental | NA            |
| 1 | 4 | 5 | 8  | DY475540 | 26S rRNA                                                       | <i>Cicer arietinum</i>  | cDNA clone       | Experimental | NA            |
| 1 | 4 | 5 | 9  | NA       | Unknown                                                        | <i>Cicer arietinum</i>  | cDNA clone       | Experimental | NA            |
| 1 | 4 | 5 | 10 | NA       | Unknown                                                        | <i>Cicer arietinum</i>  | cDNA clone       | Experimental | NA            |
| 1 | 4 | 5 | 11 | NA       | Normalisation control 3                                        | <i>Cicer arietinum</i>  | cDNA clone       | Control      | Normalisation |
| 1 | 4 | 5 | 12 | NA       | Digested pGEM-T Easy Vector II (Promega) Plasmid <i>HaeIII</i> | NA                      | Digested Plasmid | Control      | Negative      |
| 1 | 4 | 5 | 13 | DY396259 | GTP-binding protein SAR1A                                      | <i>Lathyrus sativus</i> | cDNA clone       | Experimental | NA            |
| 1 | 4 | 5 | 14 | DY396261 | Receptor-like protein kinase                                   | <i>Lathyrus sativus</i> | cDNA clone       | Experimental | NA            |
| 1 | 4 | 6 | 1  | NA       | Unknown                                                        | <i>Cicer arietinum</i>  | cDNA clone       | Experimental | NA            |
| 1 | 4 | 6 | 2  | NA       | Unknown                                                        | <i>Cicer arietinum</i>  | cDNA clone       | Experimental | NA            |
| 1 | 4 | 6 | 3  | NA       | Unknown                                                        | <i>Cicer arietinum</i>  | cDNA clone       | Experimental | NA            |
| 1 | 4 | 6 | 4  | EB085031 | Cytochrome P450                                                | <i>Cicer arietinum</i>  | cDNA clone       | Experimental | NA            |
| 1 | 4 | 6 | 5  | DY475557 | 18S rRNA, partial                                              | <i>Cicer arietinum</i>  | cDNA clone       | Experimental | NA            |
| 1 | 4 | 6 | 6  | NA       | Unknown                                                        | <i>Cicer arietinum</i>  | cDNA clone       | Experimental | NA            |
| 1 | 4 | 6 | 7  | DY475535 | Unknown                                                        | <i>Cicer arietinum</i>  | cDNA clone       | Experimental | NA            |
| 1 | 4 | 6 | 8  | EB085033 | 5.8S, 18S and 25S rRNA                                         | <i>Cicer arietinum</i>  | cDNA clone       | Experimental | NA            |
| 1 | 4 | 6 | 9  | EB085024 | Unknown                                                        | <i>Cicer arietinum</i>  | cDNA clone       | Experimental | NA            |
| 1 | 4 | 6 | 10 | DY475534 | Chlorophyll <i>a/b</i> binding protein                         | <i>Cicer arietinum</i>  | cDNA clone       | Experimental | NA            |
| 1 | 4 | 6 | 11 | EB085025 | Unknown                                                        | <i>Cicer arietinum</i>  | cDNA clone       | Experimental | NA            |
| 1 | 4 | 6 | 12 | EB085062 | Unknown                                                        | <i>Cicer arietinum</i>  | cDNA clone       | Experimental | NA            |
| 1 | 4 | 6 | 13 | NA       | Unknown                                                        | <i>Cicer arietinum</i>  | cDNA clone       | Experimental | NA            |
| 1 | 4 | 6 | 14 | NA       | Unknown                                                        | <i>Cicer arietinum</i>  | cDNA clone       | Experimental | NA            |
| 1 | 4 | 7 | 1  | DY475392 | Unknown                                                        | <i>Cicer arietinum</i>  | cDNA clone       | Experimental | NA            |
| 1 | 4 | 7 | 2  | DY475401 | Unknown                                                        | <i>Cicer arietinum</i>  | cDNA clone       | Experimental | NA            |
| 1 | 4 | 7 | 3  | DY475412 | Unknown                                                        | <i>Cicer arietinum</i>  | cDNA clone       | Experimental | NA            |
| 1 | 4 | 7 | 4  | DY475416 | Unknown                                                        | <i>Cicer arietinum</i>  | cDNA clone       | Experimental | NA            |
| 1 | 4 | 7 | 5  | DY475428 | Unknown                                                        | <i>Cicer arietinum</i>  | cDNA clone       | Experimental | NA            |
| 1 | 4 | 7 | 6  | DY475432 | Unknown                                                        | <i>Cicer arietinum</i>  | cDNA clone       | Experimental | NA            |
| 1 | 4 | 7 | 7  | DY475490 | Unknown                                                        | <i>Cicer arietinum</i>  | cDNA clone       | Experimental | NA            |
| 1 | 4 | 7 | 8  | DY475503 | Unknown                                                        | <i>Cicer arietinum</i>  | cDNA clone       | Experimental | NA            |
| 1 | 4 | 7 | 9  | DY475513 | Unknown                                                        | <i>Cicer arietinum</i>  | cDNA clone       | Experimental | NA            |
| 1 | 4 | 7 | 10 | DY475520 | Unknown                                                        | <i>Cicer arietinum</i>  | cDNA clone       | Experimental | NA            |
| 1 | 4 | 7 | 11 | DY475529 | Unknown                                                        | <i>Cicer arietinum</i>  | cDNA clone       | Experimental | NA            |
| 1 | 4 | 7 | 12 | EB085013 | 26S rRNA                                                       | <i>Cicer arietinum</i>  | cDNA clone       | Experimental | NA            |
| 1 | 4 | 7 | 13 | NA       | Unknown                                                        | <i>Cicer arietinum</i>  | cDNA clone       | Experimental | NA            |
| 1 | 4 | 7 | 14 | NA       | Unknown                                                        | <i>Cicer arietinum</i>  | cDNA clone       | Experimental | NA            |

|   |   |    |    |          |         |                        |            |              |    |
|---|---|----|----|----------|---------|------------------------|------------|--------------|----|
| 1 | 4 | 8  | 1  | DY475232 | Unknown | <i>Cicer arietinum</i> | cDNA clone | Experimental | NA |
| 1 | 4 | 8  | 2  | DY475241 | Unknown | <i>Cicer arietinum</i> | cDNA clone | Experimental | NA |
| 1 | 4 | 8  | 3  | DY475253 | Unknown | <i>Cicer arietinum</i> | cDNA clone | Experimental | NA |
| 1 | 4 | 8  | 4  | DY475256 | Unknown | <i>Cicer arietinum</i> | cDNA clone | Experimental | NA |
| 1 | 4 | 8  | 5  | DY475299 | Unknown | <i>Cicer arietinum</i> | cDNA clone | Experimental | NA |
| 1 | 4 | 8  | 6  | DY475310 | Unknown | <i>Cicer arietinum</i> | cDNA clone | Experimental | NA |
| 1 | 4 | 8  | 7  | DY475314 | Unknown | <i>Cicer arietinum</i> | cDNA clone | Experimental | NA |
| 1 | 4 | 8  | 8  | DY475326 | Unknown | <i>Cicer arietinum</i> | cDNA clone | Experimental | NA |
| 1 | 4 | 8  | 9  | DY475330 | Unknown | <i>Cicer arietinum</i> | cDNA clone | Experimental | NA |
| 1 | 4 | 8  | 10 | DY475336 | Unknown | <i>Cicer arietinum</i> | cDNA clone | Experimental | NA |
| 1 | 4 | 8  | 11 | DY475338 | Unknown | <i>Cicer arietinum</i> | cDNA clone | Experimental | NA |
| 1 | 4 | 8  | 12 | DY475340 | Unknown | <i>Cicer arietinum</i> | cDNA clone | Experimental | NA |
| 1 | 4 | 8  | 13 | DY475377 | Unknown | <i>Cicer arietinum</i> | cDNA clone | Experimental | NA |
| 1 | 4 | 8  | 14 | DY475390 | Unknown | <i>Cicer arietinum</i> | cDNA clone | Experimental | NA |
| 1 | 4 | 9  | 1  | DY475448 | Unclear | <i>Cicer arietinum</i> | cDNA clone | Experimental | NA |
| 1 | 4 | 9  | 2  | DY475495 | Unclear | <i>Cicer arietinum</i> | cDNA clone | Experimental | NA |
| 1 | 4 | 9  | 3  | DY475084 | Unknown | <i>Cicer arietinum</i> | cDNA clone | Experimental | NA |
| 1 | 4 | 9  | 4  | DY475089 | Unknown | <i>Cicer arietinum</i> | cDNA clone | Experimental | NA |
| 1 | 4 | 9  | 5  | DY475098 | Unknown | <i>Cicer arietinum</i> | cDNA clone | Experimental | NA |
| 1 | 4 | 9  | 6  | DY475102 | Unknown | <i>Cicer arietinum</i> | cDNA clone | Experimental | NA |
| 1 | 4 | 9  | 7  | DY475115 | Unknown | <i>Cicer arietinum</i> | cDNA clone | Experimental | NA |
| 1 | 4 | 9  | 8  | DY475130 | Unknown | <i>Cicer arietinum</i> | cDNA clone | Experimental | NA |
| 1 | 4 | 9  | 9  | DY475143 | Unknown | <i>Cicer arietinum</i> | cDNA clone | Experimental | NA |
| 1 | 4 | 9  | 10 | DY475156 | Unknown | <i>Cicer arietinum</i> | cDNA clone | Experimental | NA |
| 1 | 4 | 9  | 11 | DY475206 | Unknown | <i>Cicer arietinum</i> | cDNA clone | Experimental | NA |
| 1 | 4 | 9  | 12 | DY475210 | Unknown | <i>Cicer arietinum</i> | cDNA clone | Experimental | NA |
| 1 | 4 | 9  | 13 | DY475216 | Unknown | <i>Cicer arietinum</i> | cDNA clone | Experimental | NA |
| 1 | 4 | 9  | 14 | DY475223 | Unknown | <i>Cicer arietinum</i> | cDNA clone | Experimental | NA |
| 1 | 4 | 10 | 1  | DY475118 | Unclear | <i>Cicer arietinum</i> | cDNA clone | Experimental | NA |
| 1 | 4 | 10 | 2  | DY475173 | Unclear | <i>Cicer arietinum</i> | cDNA clone | Experimental | NA |
| 1 | 4 | 10 | 3  | DY475186 | Unclear | <i>Cicer arietinum</i> | cDNA clone | Experimental | NA |
| 1 | 4 | 10 | 4  | DY475214 | Unclear | <i>Cicer arietinum</i> | cDNA clone | Experimental | NA |
| 1 | 4 | 10 | 5  | DY475218 | Unclear | <i>Cicer arietinum</i> | cDNA clone | Experimental | NA |
| 1 | 4 | 10 | 6  | DY475546 | Unclear | <i>Cicer arietinum</i> | cDNA clone | Experimental | NA |
| 1 | 4 | 10 | 7  | DY475233 | Unclear | <i>Cicer arietinum</i> | cDNA clone | Experimental | NA |
| 1 | 4 | 10 | 8  | DY475257 | Unclear | <i>Cicer arietinum</i> | cDNA clone | Experimental | NA |

|   |   |    |   |    |          |                                                                          |                        |            |              |    |
|---|---|----|---|----|----------|--------------------------------------------------------------------------|------------------------|------------|--------------|----|
| 1 | 4 | 10 | 4 | 9  | DY475376 | Unclear                                                                  | <i>Cicer arietinum</i> | cDNA clone | Experimental | NA |
| 1 | 4 | 10 | 4 | 10 | DY475386 | Unclear                                                                  | <i>Cicer arietinum</i> | cDNA clone | Experimental | NA |
| 1 | 4 | 10 | 4 | 11 | DY475389 | Unclear                                                                  | <i>Cicer arietinum</i> | cDNA clone | Experimental | NA |
| 1 | 4 | 10 | 4 | 12 | DY475400 | Unclear                                                                  | <i>Cicer arietinum</i> | cDNA clone | Experimental | NA |
| 1 | 4 | 10 | 4 | 13 | DY475411 | Unclear                                                                  | <i>Cicer arietinum</i> | cDNA clone | Experimental | NA |
| 1 | 4 | 10 | 4 | 14 | DY475438 | Unclear                                                                  | <i>Cicer arietinum</i> | cDNA clone | Experimental | NA |
| 1 | 4 | 11 | 4 | 1  | DY475317 | 40S ribosomal protein S8                                                 | <i>Cicer arietinum</i> | cDNA clone | Experimental | NA |
| 1 | 4 | 11 | 4 | 2  | DY475334 | Chloroplast 30S ribosomal protein S7                                     | <i>Cicer arietinum</i> | cDNA clone | Experimental | NA |
| 1 | 4 | 11 | 4 | 3  | DY475346 | Elongation factor (translation initiation factor)                        | <i>Cicer arietinum</i> | cDNA clone | Experimental | NA |
| 1 | 4 | 11 | 4 | 4  | DY475359 | 50S ribosomal protein L27                                                | <i>Cicer arietinum</i> | cDNA clone | Experimental | NA |
| 1 | 4 | 11 | 4 | 5  | DY475394 | 60S ribosomal protein L39                                                | <i>Cicer arietinum</i> | cDNA clone | Experimental | NA |
| 1 | 4 | 11 | 4 | 6  | DY475406 | FKBP-type peptidyl-prolyl cis-trans isomerase (EC 5.2.1.8)               | <i>Cicer arietinum</i> | cDNA clone | Experimental | NA |
| 1 | 4 | 11 | 4 | 7  | DY475545 | Chloroplast 4.5S, 5S, 16S and 23S mRNA                                   | <i>Cicer arietinum</i> | cDNA clone | Experimental | NA |
| 1 | 4 | 11 | 4 | 8  | DY475150 | 18S nuclear rRNA                                                         | <i>Cicer arietinum</i> | cDNA clone | Experimental | NA |
| 1 | 4 | 11 | 4 | 9  | DY475154 | Chloroplast 4.5S/5S/16S/23S mRNA                                         | <i>Cicer arietinum</i> | cDNA clone | Experimental | NA |
| 1 | 4 | 11 | 4 | 10 | DY475211 | 26S rRNA                                                                 | <i>Cicer arietinum</i> | cDNA clone | Experimental | NA |
| 1 | 4 | 11 | 4 | 11 | DY475375 | Sucrose responsive transcription factor                                  | <i>Cicer arietinum</i> | cDNA clone | Experimental | NA |
| 1 | 4 | 11 | 4 | 12 | DY475059 | Nuclear transport factor                                                 | <i>Cicer arietinum</i> | cDNA clone | Experimental | NA |
| 1 | 4 | 11 | 4 | 13 | DY475124 | Aquaporin                                                                | <i>Cicer arietinum</i> | cDNA clone | Experimental | NA |
| 1 | 4 | 11 | 4 | 14 | DY475174 | Aquaporin membrane protein                                               | <i>Cicer arietinum</i> | cDNA clone | Experimental | NA |
| 1 | 4 | 12 | 4 | 1  | CV793607 | Flavonol glucosyl transferase                                            | <i>Cicer arietinum</i> | cDNA clone | Experimental | NA |
| 1 | 4 | 12 | 4 | 2  | CV793609 | Similar to elicitor-inducible receptor-like protein                      | <i>Cicer arietinum</i> | cDNA clone | Experimental | NA |
| 1 | 4 | 12 | 4 | 3  | CV793590 | Protein translation factor homolog (translation initiation factor nps45) | <i>Cicer arietinum</i> | cDNA clone | Experimental | NA |
| 1 | 4 | 12 | 4 | 4  | CV793588 | Gamma-thionen type defensin/protease inhibitor                           | <i>Cicer arietinum</i> | cDNA clone | Experimental | NA |
| 1 | 4 | 12 | 4 | 5  | DY475176 | Chloroplast genome DNA                                                   | <i>Cicer arietinum</i> | cDNA clone | Experimental | NA |
| 1 | 4 | 12 | 4 | 6  | DY475224 | Plastocyanin                                                             | <i>Cicer arietinum</i> | cDNA clone | Experimental | NA |
| 1 | 4 | 12 | 4 | 7  | DY475285 | Photosystem I reaction centre subunit VI-2                               | <i>Cicer arietinum</i> | cDNA clone | Experimental | NA |
| 1 | 4 | 12 | 4 | 8  | DY475294 | NADH-ubiquinone oxidoreductase (EC 1.6.5.3)                              | <i>Cicer arietinum</i> | cDNA clone | Experimental | NA |
| 1 | 4 | 12 | 4 | 9  | DY475305 | Thylakoid protein                                                        | <i>Cicer arietinum</i> | cDNA clone | Experimental | NA |
| 1 | 4 | 12 | 4 | 10 | DY475345 | Photosystem I assembly protein ycf3                                      | <i>Cicer arietinum</i> | cDNA clone | Experimental | NA |
| 1 | 4 | 12 | 4 | 11 | DY475423 | ATP synthase (EC 3.6.1.34)                                               | <i>Cicer arietinum</i> | cDNA clone | Experimental | NA |
| 1 | 4 | 12 | 4 | 12 | DY475434 | Proton pump interactor protein                                           | <i>Cicer arietinum</i> | cDNA clone | Experimental | NA |
| 1 | 4 | 12 | 4 | 13 | DY475201 | 60S ribosomal protein L34                                                | <i>Cicer arietinum</i> | cDNA clone | Experimental | NA |
| 1 | 4 | 12 | 4 | 14 | DY475258 | 40S ribosomal protein S11                                                | <i>Cicer arietinum</i> | cDNA clone | Experimental | NA |
| 1 | 4 | 13 | 4 | 1  | DY475141 | Beta-galactosidase (EC 3.2.1.23)                                         | <i>Cicer arietinum</i> | cDNA clone | Experimental | NA |

|   |   |    |    |          |                                                                                            |                        |            |              |    |
|---|---|----|----|----------|--------------------------------------------------------------------------------------------|------------------------|------------|--------------|----|
| 1 | 4 | 13 | 4  | DY475152 | Cytidine deaminase enzyme                                                                  | <i>Cicer arietinum</i> | cDNA clone | Experimental | NA |
| 1 | 4 | 13 | 3  | DY475302 | 4-alpha-glucanotransferase (EC 2.4.1.25)                                                   | <i>Cicer arietinum</i> | cDNA clone | Experimental | NA |
| 1 | 4 | 13 | 4  | DY475308 | Glutamate dehydrogenase (EC 1.4.1.3)                                                       | <i>Cicer arietinum</i> | cDNA clone | Experimental | NA |
| 1 | 4 | 13 | 5  | DY475321 | Mitochondrial glyoxylase                                                                   | <i>Cicer arietinum</i> | cDNA clone | Experimental | NA |
| 1 | 4 | 13 | 6  | DY475548 | Cytosolic fructose 1,6-bisphosphatase (EC 3.1.3.11)                                        | <i>Cicer arietinum</i> | cDNA clone | Experimental | NA |
| 1 | 4 | 13 | 7  | DY475393 | Cytochrome C biogenesis protein ccsA                                                       | <i>Cicer arietinum</i> | cDNA clone | Experimental | NA |
| 1 | 4 | 13 | 8  | DY475398 | Glutamine synthetase (glutamate ammonia ligase) (EC 6.3.1.2)                               | <i>Cicer arietinum</i> | cDNA clone | Experimental | NA |
| 1 | 4 | 13 | 9  | DY475408 | Xylosidase                                                                                 | <i>Cicer arietinum</i> | cDNA clone | Experimental | NA |
| 1 | 4 | 13 | 10 | DY475417 | Probable 3-hydroxyisobutyrate dehydrogenase (HIBADH) mitochondrial precursor (EC 1.1.1.31) | <i>Cicer arietinum</i> | cDNA clone | Experimental | NA |
| 1 | 4 | 13 | 11 | CV793597 | Pathogenesis-related protein 4A                                                            | <i>Cicer arietinum</i> | cDNA clone | Experimental | NA |
| 1 | 4 | 13 | 12 | CV793599 | Protein containing leucine-zipper motif                                                    | <i>Cicer arietinum</i> | cDNA clone | Experimental | NA |
| 1 | 4 | 13 | 13 | CV793601 | Leucine-zipper containing protein                                                          | <i>Cicer arietinum</i> | cDNA clone | Experimental | NA |
| 1 | 4 | 13 | 14 | CV793605 | Multi-resistance protein ABC transporter                                                   | <i>Cicer arietinum</i> | cDNA clone | Experimental | NA |
| 1 | 4 | 14 | 1  | DY475190 | S-adenosylmethionine synthetase enzyme (EC 2.5.1.6)                                        | <i>Cicer arietinum</i> | cDNA clone | Experimental | NA |
| 1 | 4 | 14 | 2  | DY475207 | Endoxyloglucan transferase involved in water-stress                                        | <i>Cicer arietinum</i> | cDNA clone | Experimental | NA |
| 1 | 4 | 14 | 3  | DY475225 | Proline oxidase                                                                            | <i>Cicer arietinum</i> | cDNA clone | Experimental | NA |
| 1 | 4 | 14 | 4  | DY475250 | Glutathione S-transferase (EC 2.5.1.18)                                                    | <i>Cicer arietinum</i> | cDNA clone | Experimental | NA |
| 1 | 4 | 14 | 5  | DY475276 | Homocysteine methyltransferase                                                             | <i>Cicer arietinum</i> | cDNA clone | Experimental | NA |
| 1 | 4 | 14 | 6  | DY475328 | Ubiquitin conjugating protein                                                              | <i>Cicer arietinum</i> | cDNA clone | Experimental | NA |
| 1 | 4 | 14 | 7  | DY475397 | Superoxide dismutase copper chaperone precursor                                            | <i>Cicer arietinum</i> | cDNA clone | Experimental | NA |
| 1 | 4 | 14 | 8  | DY475474 | Heat shock protein                                                                         | <i>Cicer arietinum</i> | cDNA clone | Experimental | NA |
| 1 | 4 | 14 | 9  | DY475470 | Protein kinase mRNA                                                                        | <i>Cicer arietinum</i> | cDNA clone | Experimental | NA |
| 1 | 4 | 14 | 10 | DY475508 | Hypothetical protein with a membrane spanning ring-H2 finger domain                        | <i>Cicer arietinum</i> | cDNA clone | Experimental | NA |
| 1 | 4 | 14 | 11 | DY475066 | Cysteine proteinase                                                                        | <i>Cicer arietinum</i> | cDNA clone | Experimental | NA |
| 1 | 4 | 14 | 12 | DY475096 | Glyceraldehyde 3-phosphate dehydrogenase (EC 1.2.1.12)                                     | <i>Cicer arietinum</i> | cDNA clone | Experimental | NA |
| 1 | 4 | 14 | 13 | DY475543 | Fructose-1,6-bisphosphatase (EC 3.1.3.11)                                                  | <i>Cicer arietinum</i> | cDNA clone | Experimental | NA |
| 1 | 4 | 14 | 14 | DY475113 | Cytochrome C oxidase subunit                                                               | <i>Cicer arietinum</i> | cDNA clone | Experimental | NA |
